# Supplementary material
Source: PubMed Central journal article supplement (PMC7160276)
Supplement: advancesADV2019000960C-suppl1.pdf [file advancesADV2019000960C-suppl1.pdf]

# Supplement 1

## Summary of Searches - SR:

|                                              |             |                           |
|----------------------------------------------|-------------|---------------------------|
| <b>Total No. Retrieved:</b>                  | <b>1915</b> |                           |
| Medline:                                     | 254         |                           |
| Embase:                                      | 367         |                           |
| Cochrane Library:                            | 1294        |                           |
| <b>Duplicates:</b>                           | 163         |                           |
| <b>No. Total without duplicates:</b>         | <b>1752</b> | <b>ENDNOTE FILE READY</b> |
| <b>Screening (Title and Abstract Review)</b> |             |                           |
| No. Excluded:                                |             |                           |
| Included for Full Text review:               |             |                           |
| <b>Selection (Full Text Review)</b>          |             |                           |
| No. Excluded:                                |             |                           |
| Reasons for exclusions:                      |             |                           |
| 1.                                           |             |                           |

## Summary of Searches – Not SR :

|                                              |              |  |
|----------------------------------------------|--------------|--|
| <b>Total No. Retrieved:</b>                  | <b>17160</b> |  |
| Medline:                                     | 8558         |  |
| Embase:                                      | 8592         |  |
| Cochrane Library:                            | --           |  |
| <b>Duplicates:</b>                           |              |  |
| <b>No. Total without duplicates:</b>         |              |  |
| <b>Screening (Title and Abstract Review)</b> |              |  |
| No. Excluded:                                |              |  |
| Included for Full Text review:               |              |  |
| <b>Selection (Full Text Review)</b>          |              |  |
| No. Excluded:                                |              |  |
| Reasons for exclusions:                      |              |  |
| 1.                                           |              |  |

## Guideline Question: GENERAL SEARCH FOR ALL QUESTIONS (BUT Cancer Screening)

Medline

z – GL10 – SR - General\_Medline

z – GL10 – General\_ not SR\_Medline

### OVERVIEW

|                 |                                                                                              |
|-----------------|----------------------------------------------------------------------------------------------|
| Interface:      | Ovid                                                                                         |
| Database:       | Ovid MEDLINE(R) In-Process & Other Non-Indexed Citations and Ovid MEDLINE(R) 1946 to Present |
| Date of Search: | May 9th, 2016                                                                                |
| Study Types:    | Systematic reviews;                                                                          |
| Limits:         | Publication date: not limits                                                                 |

### Search Strategy: search terms (number of results)

#### Any Dx intervention (CTPA, CUS, D-dimer, VQ)

- 1 ultrasonography/ or ultrasonography, doppler/ (77097)
- 2 (ultrasound\$ or ultrason\$ or sonograph\$).mp. (365834)
- 3 or/1-2 (365834)
- 4 Fibrin Fibrinogen Degradation Products/ (7338)
- 5 (D-dimer or d dimer).mp. (7096)
- 6 (label\$ adj2 (fibrogen or fibrinogen)).mp. (631)
- 7 4 or 5 or 6 (11390)
- 8 exp Cone-Beam Computed Tomography/ (5051)
- 9 Tomography, Spiral Computed/ (6878)
- 10 Tomography, X-Ray Computed/ (317079)
- 11 (compute\* tomograph\* or compute\*-tomograph\*).mp. (222821)
- 12 or/8-11 (431702)
- 13 exp Ventilation-Perfusion Ratio/ (5575)
- 14 (lung adj1 (ventilation or perfusion)).ti,ab,kw. (5817)
- 15 (lung adj ventilation adj scan).ti,ab,kw. (1)
- 16 (lung adj perfusion adj scan).ti,ab,kw. (146)
- 17 (lung adj1 scan).ti,ab,kw. (1081)
- 18 VQ scan.mp. (25)

19 13 or 14 or 15 or 16 or 17 or 18 (11400)

20 3 or 7 or 12 or 19 (773789)

**VTE terms:**

21 exp Thromboembolism/ or exp Venous Thromboembolism/ (47568)

22 exp Pulmonary Embolism/ (33893)

23 exp Venous Thrombosis/ (48320)

24 Thrombophlebitis/ (21375)

25 (DVT or VTE or PE).mp. (39840)

26 ((Pulmon\$ or vein or venous or lung) adj (Emboli\$ or thromb\$)).mp. (92654)

27 (thrombus\* or thrombotic\* or thrombolic\* or thromboemboli\* or thrombos\* or embol\*).mp. (326912)

28 (((deep or thromb\* or stasis) adj2 (vein\* or venous)) or (blood flow stasis or blood clot)).mp. (67667)

29 or/21-28 (368661)

**Dx filter:**

30 exp "Sensitivity and Specificity"/ (469183)

31 (sensitivity or specificity).tw. (809446)

32 (predictive adj3 value\$).tw. (81055)

33 exp diagnostic errors/ (101771)

34 ((false adj positiv\$) or (false adj negativ\$)).tw. (62229)

35 (observer adj variation\$).tw. (1026)

36 (roc adj curve\$).tw. (18740)

37 (likelihood adj3 ratio\$).tw. (11054)

38 likelihood functions/ (18752)

39 \*Thromboembolism/di, ra, ri, us (798)

40 \*Thrombophlebitis/di, ra, ri, us (3026)

41 \*Venous Thrombosis/di, ra, ri, us (3030)

42 or/30-41 (1283612)

43 20 and 29 and 42 (8812) → [Annotation: Any Dx and VTE AND DxFilter](#)

SR filter:

- 44 meta-analysis/ (65208)
- 45 meta-analysis as topic/ (14831)
- 46 (meta analy\* or metanaly\* or metaanaly\*).ti,ab. (90932)
- 47 (reference list\* or bibliograph\* or hand search\* or manual search\* or relevant journals).ab. (30721)
- 48 ((systematic\* or evidence\*) adj2 (review\* or overview\*)).ti,ab. (105255)
- 49 (search strategy or search criteria or systematic search or study selection or data extraction).ab. (33398)
- 50 (search\* adj4 literature).ab. (37180)
- 51 (medline or pubmed or cochrane or embase or psychlit or psyclit or psychinfo or psycinfo or cinahl or science citation index or bids or cancerlit).ab. (119376)
- 52 ((pool\* or combined) adj2 (data or trials or studies or results)).ab. (38566)
- 53 cochrane.jw. (12302)
- 54 or/44-53 (287349)
- 55 animals/ not humans/ (4203767)
- 56 exp Animals, Laboratory/ (770845)
- 57 exp Animal Experimentation/ (7910)
- 58 exp Models, Animal/ (464566)
- 59 exp Rodentia/ (2869455)
- 60 (rat or rats or mouse or mice).ti. (1189636)
- 61 or/55-60 (4963714)
- 62 54 not 61 (274387)

63 43 and 62 (254) → Annotation: (Any Dxinterv + VTE + DxFilter Not animal) and SR Filter

64 43 not 63 (8558) → (Any Dxinterv + VTE + DxFilter Not animal) (not in previous SR)

**Records Retrieved:**

- 1- SR = 254
- 2- Others= 8558

z - GL10 - General \_SR \_Embase  
z - GL10 - General \_Not SR \_Embase

## OVERVIEW

Interface: Ovid  
Database: Embase 1974 to 2016 Week 07  
Date of Search: May 9th, 2016  
Study Types: Systematic reviews;  
Limits: Publication date: not limited

## Search Strategy: search terms (number of results)

- [Any Dx intervention \(CTPA, CUS, D-dimer, VQ\)](#)
- 1 ultrasonography/ or ultrasonography, doppler/ (195494)
  - 2 (ultrasound\$ or ultrason\$ or sonograph\$).mp. (479288)
  - 3 1 or 2 (554916)
  - 4 fibrin degradation product/ (3142)
  - 5 D dimer/ (13156)
  - 6 (D-dimer or d dimer).mp. (16014)
  - 7 (label\$ adj2 (fibrogen or fibrinogen)).mp. (557)
  - 8 4 or 5 or 6 or 7 (18440)
  - 9 exp cone beam computed tomography/ (8539)
  - 10 spiral computer assisted tomography/ (10925)
  - 11 computer assisted tomography/ (580883)
  - 12 (compute\* tomograph\* or compute\*-tomograph\*).mp. (360312)
  - 13 or/9-12 (744247)
  - 14 exp lung scintiscanning/ (6764)
  - 15 exp Ventilation-Perfusion Ratio/ (6101)
  - 16 (lung adj1 (ventilation or perfusion)).ti,ab,kw. (7981)
  - 17 (lung adj ventilation adj scan).ti,ab,kw. (3)
  - 18 (lung adj perfusion adj scan).ti,ab,kw. (218)
  - 19 (lung adj1 scan).ti,ab,kw. (1348)
  - 20 VQ scan.mp. (105)

21 14 or 15 or 16 or 17 or 18 or 19 or 20 (18644)  
22 1 or 2 or 3 or 4 or 5 or 6 or 7 or 8 or 9 or 10 or 11 or 12 or 13 or 14 or 15 or 16 or 17 or 18 or 19 or 20 or 21 (1239511) → [Annotation: in - Any Dx intervention\\_Embase](#)

[VTE terms:](#)

23 exp vein thrombosis/ (100825)  
24 exp Venous Thromboembolism/ (111295)  
25 exp 'lung embolism'/ (70029)  
26 Thrombophlebitis/ (16025)  
27 (PE or DVT or VTE).mp. (62340)  
28 ((Pulmon\$ or vein or venous or lung) adj (Emboli\$ or thromb\$)).mp. (166579)  
29 (thrombus\* or thrombotic\* or thrombolic\* or thromboemboli\* or thrombos\* or embol\*).mp. (527773)  
30 (((deep or thromb\* or stasis) adj2 (vein\* or venous)) or (blood flow stasis or blood clot)).mp. (158324)  
31 or/23-30 (597688)  
32 exp "sensitivity and specificity"/ (245520)  
33 (sensitivity or specificity).tw. (958912)  
34 (predictive adj3 value\$).tw. (114518)  
35 ((false adj positiv\$) or (false adj negativ\$)).tw. (77829)  
36 (observer adj variation\$).tw. (1345)  
37 (roc adj curve\$).tw. (33158)  
38 (likelihood adj3 ratio\$).tw. (14400)  
39 \*Diagnostic Accuracy/ (6352)  
40 \*Thromboembolism/di (2018)  
41 \*Thrombophlebitis/di (1624)  
42 \*Venous Thrombosis/di (926)  
43 32 or 33 or 34 or 35 or 36 or 37 or 38 or 39 or 40 or 41 or 42 (1192770)

44 22 and 31 and 43 (8959) → [Annotation: \(Any Dx intervention + VTE + DxFilter\)](#)

[SR filter:](#)

45 systematic review/ (105938)  
46 meta-analysis/ (108354)

- 47 (meta analy\* or metanaly\* or metaanaly\*).ti,ab. (119945)
- 48 (reference list\* or bibliograph\* or hand search\* or manual search\* or relevant journals).ab. (35710)
- 49 ((systematic\* or evidence\*) adj2 (review\* or overview\*)).ti,ab. (129874)
- 50 (search strategy or search criteria or systematic search or study selection or data extraction).ab. (38947)
- 51 (search\* adj4 literature).ab. (46763)
- 52 (medline or pubmed or cochrane or embase or psychlit or psychlit or psychinfo or psycinfo or cinahl or science citation index or bids or cancerlit).ab. (147674)
- 53 ((pool\* or combined) adj2 (data or trials or studies or results)).ab. (49701)
- 54 cochrane.jw. (13184)
- 55 or/45-54 (384419)
- 56 animals/ not humans/ (1150971)
- 57 nonhuman/ (4742930)
- 58 exp Animal Experiment/ (1824805)
- 59 exp Experimental Animal/ (508398)
- 60 animal model/ (868145)
- 61 exp Rodent/ (3009466)
- 62 (rat or rats or mouse or mice).ti. (1283287)
- 63 56 or 57 or 58 or 59 or 60 or 61 or 62 (6713559)
- 64 55 not 63 (347559)
- 65 44 and 64 (367) → Annotation: (Any Dx intervention + VTE + DxFilter) and SR filter not animal
- 66 44 not 65 (8592) → Annotation: (Any Dx intervention + VTE + DxFilter) not SR

**Records Retrieved:**

1. And SR filter=367
2. And RCT filter (not in previous 367)=8592

Cochrane Library [z – GL10-General](#)

Interface: Cochrane Library  
 Database: Cochrane Database of Systematic Reviews  
 Date of Search: Month X, 2016  
 Study Types: Systematic reviews;  
 Limits: Publication date:

**Search Strategy: search terms (number of results)**

**Any Dx intervention (CTPA, CUS, D-dimer, VQ)**

#1 MeSH descriptor: [Ultrasonography] this term only 940  
 #2 MeSH descriptor: [Ultrasonography, Doppler] this term only 542  
 #3 (ultrasound\* or ultrason\* or sonograph\*) 24608  
 #4 #1 or #2 or #3 24608  
 #5 MeSH descriptor: [Ventilation-Perfusion Ratio] explode all trees 132  
 #6 (lung near/1 (ventilation or perfusion)):ti,ab,kw 1068  
 #7 (lung near ventilation near scan):ti,ab,kw 19  
 #8 (lung near perfusion near scan):ti,ab,kw 42  
 #9 (lung near/1 scan):ti,ab,kw 66  
 #10 (VQ scan) 11  
 #11 #5 or #6 or #7 or #8 or #9 or #10 1218  
 #12 MeSH descriptor: [Fibrin Fibrinogen Degradation Products] this term only 488  
 #13 (D-dimer or d dimer) 1190  
 #14 (label\* near/2 (fibrogen or fibrinogen)) 63  
 #15 #12 or #13 or #14 1400  
 #16 MeSH descriptor: [Tomography, X-Ray Computed] this term only 4171  
 #17 MeSH descriptor: [Cone-Beam Computed Tomography] explode all trees 139  
 #18 MeSH descriptor: [Tomography, Spiral Computed] this term only 215  
 #19 (compute\* tomograph\* or compute\*-tomograph\*) 13501  
 #20 (CT or CAT or CAPT):ti,ab 10276  
 #21 #16 or #17 or #18 or #19 or #20 18898  
 #22 #4 or #11 or #15 or 21 130946

**VTE terms:**

#23 MeSH descriptor: [Venous Thrombosis] explode all trees 2448  
 #24 MeSH descriptor: [Thromboembolism] explode all trees 1892  
 #25 MeSH descriptor: [Venous Thromboembolism] explode all trees 513  
 #26 MeSH descriptor: [Pulmonary Embolism] explode all trees 982  
 #27 MeSH descriptor: [Thrombophlebitis] this term only 1095  
 #28 (DVT or VTE or PE) 9108  
 #29 ((Pulmon\* or vein or venous or lung) near (Emboli\* or thromb\*)) 9413  
 #30 (Thrombus\* or thrombotic\* or thrombolic\* or thromboemboli\* or thrombos\* or embol\*) 22668  
 #31 (((deep or thromb\* or stasis) near/2 (vein\* or venous)) or (blood flow stasis or blood clot)) 8726  
 #32 #23 or #24 or #25 or #26 or #27 or #28 or #29 or #30 or #31 30977  
 #33 #22 and #32 7717 → [Any Dx Intervention AND VTE](#)

**Dx filter:**

#34 MeSH descriptor: [Sensitivity and Specificity] explode all trees 17846  
 #35 (sensitivity or specificity) 59020



|                                                                                                                                                                                                                                                                                                                                              |                                                                                                                                                                   |       |                                                                   |
|----------------------------------------------------------------------------------------------------------------------------------------------------------------------------------------------------------------------------------------------------------------------------------------------------------------------------------------------|-------------------------------------------------------------------------------------------------------------------------------------------------------------------|-------|-------------------------------------------------------------------|
| #36                                                                                                                                                                                                                                                                                                                                          | (predictive adj3 value\$)                                                                                                                                         | 157   |                                                                   |
| #37                                                                                                                                                                                                                                                                                                                                          | MeSH descriptor: [Diagnostic Errors] explode all trees                                                                                                            | 2854  |                                                                   |
| #38                                                                                                                                                                                                                                                                                                                                          | (false adj positiv*) or (false adj negativ*)                                                                                                                      | 202   |                                                                   |
| #39                                                                                                                                                                                                                                                                                                                                          | (observer adj variation*)                                                                                                                                         | 263   |                                                                   |
| #40                                                                                                                                                                                                                                                                                                                                          | (roc adj curve*)                                                                                                                                                  | 43    |                                                                   |
| #41                                                                                                                                                                                                                                                                                                                                          | (likelihood adj3 ratio*)                                                                                                                                          | 638   |                                                                   |
| #42                                                                                                                                                                                                                                                                                                                                          | MeSH descriptor: [Likelihood Functions] explode all trees                                                                                                         | 393   |                                                                   |
| #43                                                                                                                                                                                                                                                                                                                                          | MeSH descriptor: [Thromboembolism] explode all trees and with qualifier(s): [Diagnosis - DI, Radiography - RA, Radionuclide imaging - RI, Ultrasonography - US]   | 229   |                                                                   |
| #44                                                                                                                                                                                                                                                                                                                                          | MeSH descriptor: [Thrombophlebitis] explode all trees and with qualifier(s): [Diagnosis - DI, Radiography - RA, Radionuclide imaging - RI, Ultrasonography - US]  | 260   |                                                                   |
| #45                                                                                                                                                                                                                                                                                                                                          | MeSH descriptor: [Venous Thrombosis] explode all trees and with qualifier(s): [Diagnosis - DI, Radiography - RA, Radionuclide imaging - RI, Ultrasonography - US] | 537   |                                                                   |
| #46                                                                                                                                                                                                                                                                                                                                          | #34 or #35 or #36 or #37 or #38 or #39 or #40 or #41 or #42 or #43 or #44 or #45                                                                                  | 67078 |                                                                   |
| #47                                                                                                                                                                                                                                                                                                                                          | #33 and #46 Publication Year from 2006 to 2016                                                                                                                    | 1935  | → Any Dx and VTE and Dxfilter → z – <a href="#">GL10-General_</a> |
| <p>All Results (1935)</p> <p>Cochrane Reviews (1443)</p> <p>All</p> <p>Review (1206) <b>endnote</b></p> <p>Protocol</p> <p>Other Reviews (87) <b>endnote</b></p> <p>Trials (342) <b>endnote</b></p> <p>Methods Studies (2)</p> <p>Technology Assessments (1) <b>endnote</b></p> <p>Economic Evaluations (48)</p> <p>Cochrane Groups (12)</p> |                                                                                                                                                                   |       |                                                                   |
| <p><b>Records Retrieved: 1294</b></p> <p>Cochrane reviews: 1206</p> <p>Other reviews: 87</p> <p>Technology Assessments (1)</p>                                                                                                                                                                                                               |                                                                                                                                                                   |       |                                                                   |

## Supplement 2. Evidence profiles for intermediate-risk and high-risk patients with suspected lower extremity deep vein thrombosis

### Intermediate risk (25% and 35%)

**Table S1. Proximal Compression ultrasound test accuracy in intermediate-risk patients**

[Click link for interactive summary of findings \(iSoF\) table.](#)

**Patient or population:** Patients with suspected lower extremity deep vein thrombosis

**New test:** Proximal CUS

**Setting:** Inpatient and outpatient

**Pooled sensitivity:** 0.90 (95% CI: 0.87 to 0.93) | **Pooled specificity:** 0.99 (95% CI: 0.98 to 0.99)

| Test result                                    | Number of results per 1,000 patients tested (95% CI)                              |                                                                                   | Number of participants (studies) | Quality of the Evidence (GRADE)      |
|------------------------------------------------|-----------------------------------------------------------------------------------|-----------------------------------------------------------------------------------|----------------------------------|--------------------------------------|
|                                                | Prevalence 25% <sup>1,2</sup> in intermediate-risk patients with suspected LE DVT | Prevalence 35% <sup>1,2</sup> in intermediate-risk patients with suspected LE DVT |                                  |                                      |
| <b>True positives</b>                          | <b>225</b> (218 to 233)                                                           | <b>315</b> (305 to 326)                                                           | 2889 (12)                        | ⊕⊕⊕⊕<br><b>HIGH</b> <sup>a,b,c</sup> |
| <b>False negatives</b>                         | <b>25</b> (17 to 32)                                                              | <b>35</b> (24 to 45)                                                              |                                  |                                      |
| <b>True negatives</b>                          | <b>742</b> (735 to 742)                                                           | <b>644</b> (637 to 644)                                                           | 2889 (12)                        | ⊕⊕⊕⊕<br><b>HIGH</b> <sup>a,b,c</sup> |
| <b>False positives</b>                         | <b>8</b> (7 to 15)                                                                | <b>6</b> (6 to 13)                                                                |                                  |                                      |
| Inconclusive test results                      | 19                                                                                |                                                                                   | 2908 (12)                        | -                                    |
| Complications arising from the diagnostic test | Not reported                                                                      |                                                                                   |                                  |                                      |

**CI:** Confidence interval

<sup>1</sup>Fancher T et al. BMJ 2004; 329(7470):821. Clinical PTP and rapid D-dimer testing; mean prevalence of DVT in accuracy studies 11%; mean prevalence of DVT in management studies 25%

<sup>2</sup>Disease prevalence applies to the index test in each pathway. Prevalence applied to the accuracy of each subsequent test depends on the result of the previous test in the pathway.

#### Explanations

- Certainty of evidence not downgraded for risk of bias, although few studies had a combination of reference standards that were judged to be acceptable by the panel.
- Minor inconsistency for sensitivity noted but judged to be insufficient to downgrade the certainty of evidence. Minor inconsistency for specificity noted but judged to be insufficient to downgrade the certainty of evidence.
- Certainty of evidence was downgraded for indirectness in instances where this test was not the index test in a diagnostic pathway. There was a lack of data on the accuracy of this test following a previous test in a pathway. Thus, sensitivity and specificity used for modeling in these instances were based on the test accuracy of the individual test rather than using the test in a pathway.

**Table S2. Whole leg ultrasound test accuracy in intermediate-risk patients**

[Click link for interactive summary of findings \(iSoF\) table.](#) Patient or population: Patients with suspected lower extremity deep vein thrombosis

**New test:** Whole Leg US

**Setting:** Inpatient and outpatient

**Pooled sensitivity:** 0.94 (95% CI: 0.91 to 0.96) | **Pooled specificity:** 0.97 (95% CI: 0.95 to 0.99)

| Test result                                    | Number of results per 1,000 patients tested (95% CI)                              |                                                                                   | Number of participants (studies) | Quality of the Evidence (GRADE)      |
|------------------------------------------------|-----------------------------------------------------------------------------------|-----------------------------------------------------------------------------------|----------------------------------|--------------------------------------|
|                                                | Prevalence 25% <sup>1,2</sup> in intermediate-risk patients with suspected LE DVT | Prevalence 35% <sup>1,2</sup> in intermediate-risk patients with suspected LE DVT |                                  |                                      |
| <b>True positives</b>                          | <b>235</b> (228 to 240)                                                           | <b>329</b> (320 to 336)                                                           | 1725 (10)                        | ⊕⊕⊕⊕<br><b>HIGH</b> <sup>a,b,c</sup> |
| <b>False negatives</b>                         | <b>15</b> (10 to 22)                                                              | <b>21</b> (14 to 30)                                                              |                                  |                                      |
| <b>True negatives</b>                          | <b>730</b> (711 to 740)                                                           | <b>632</b> (616 to 641)                                                           | 1725 (10)                        | ⊕⊕⊕⊕<br><b>HIGH</b> <sup>a,b,c</sup> |
| <b>False positives</b>                         | <b>20</b> (10 to 39)                                                              | <b>18</b> (9 to 34)                                                               |                                  |                                      |
| Inconclusive test results                      | 8                                                                                 |                                                                                   | 1733 (10)                        |                                      |
| Complications arising from the diagnostic test | Not reported                                                                      |                                                                                   |                                  |                                      |

**CI:** Confidence interval

<sup>1</sup>Fancher T et al. BMJ 2004; 329(7470):821. Clinical PTP and rapid D-dimer testing; mean prevalence of DVT in accuracy studies 11%; mean prevalence of DVT in management studies 25%

<sup>2</sup>Disease prevalence applies to the index test in each pathway. Prevalence applied to the accuracy of each subsequent test depends on the result of the previous test in the pathway.

*Explanations*

- a. Certainty of evidence not downgraded for risk of bias, although few studies had a combination of reference standards that were judged to be acceptable by the panel.
- b. Minor inconsistency for sensitivity noted but judged to be insufficient to downgrade the certainty of evidence. Minor inconsistency for specificity noted but judged to be insufficient to downgrade the certainty of evidence.
- c. Certainty of evidence was downgraded for indirectness in instances where this test was not the index test in a diagnostic pathway. There was a lack of data on the accuracy of this test following a previous test in a pathway. Thus, sensitivity and specificity used for modeling in these instances were based on the test accuracy of the individual test rather than using the test in a pathway.

**Table S3. Serial ultrasound test accuracy in intermediate-risk patients**

[Click link for interactive summary of findings \(iSoF\) table](#)

**Patient or population:** Patients with suspected lower extremity deep vein thrombosis

**New test:** Serial US

**Setting:** Inpatient and outpatient

**Pooled sensitivity:** 0.98 (95% CI: 0.96 to 0.99) | **Pooled specificity:** 0.998 (95% CI: 0.993 to 0.999)

| Test result                                    | Number of results per 1,000 patients tested (95% CI)                              |                                                                                   | Number of participants (studies) | Quality of the Evidence (GRADE) |
|------------------------------------------------|-----------------------------------------------------------------------------------|-----------------------------------------------------------------------------------|----------------------------------|---------------------------------|
|                                                | Prevalence 25% <sup>1,2</sup> in intermediate-risk patients with suspected LE DVT | Prevalence 35% <sup>1,2</sup> in intermediate-risk patients with suspected LE DVT |                                  |                                 |
| True positives                                 | 245 (240 to 248)                                                                  | 343 (336 to 347)                                                                  | 2415 (6)                         | ⊕⊕⊕⊕<br>HIGH <sup>a,b,c</sup>   |
| False negatives                                | 5 (2 to 10)                                                                       | 7 (3 to 14)                                                                       |                                  |                                 |
| True negatives                                 | 749 (745 to 749)                                                                  | 649 (645 to 649)                                                                  | 2415 (6)                         | ⊕⊕⊕⊕<br>HIGH <sup>a,b,c</sup>   |
| False positives                                | 1 (1 to 5)                                                                        | 1 (1 to 5)                                                                        |                                  |                                 |
| Inconclusive test results                      | 0                                                                                 |                                                                                   | 2415 (6)                         |                                 |
| Complications arising from the diagnostic test | Not reported                                                                      |                                                                                   |                                  |                                 |

**CI:** Confidence interval

<sup>1</sup>Fancher T et al. BMJ 2004; 329(7470):821. Clinical PTP and rapid D-dimer testing; mean prevalence of DVT in accuracy studies 11%; mean prevalence of DVT in management studies 25%

<sup>2</sup>Disease prevalence applies to the index test in each pathway. Prevalence applied to the accuracy of each subsequent test depends on the result of the previous test in the pathway.

*Explanations*

a. Certainty of evidence not downgraded for risk of bias, although few studies had a combination of reference standards that were judged to be acceptable by the panel.

b. Minor inconsistency for sensitivity noted but judged to be insufficient to downgrade the certainty of evidence. Minor inconsistency for specificity noted but judged to be insufficient to downgrade the certainty of evidence.

c. Certainty of evidence was downgraded for indirectness in instances where this test was not the index test in a diagnostic pathway. There was a lack of data on the accuracy of this test following a previous test in a pathway. Thus, sensitivity and specificity used for modeling in these instances were based on the test accuracy of the individual test rather than using the test in a pathway.

**Table S4. D-dimer test accuracy in intermediate-risk patients**

[Click link for interactive summary of findings \(iSoF\) table.](#) **Patient or population:** Patients with suspected lower extremity deep vein thrombosis

**New test:** D-dimer

**Setting:** Inpatient and outpatient

**Pooled sensitivity:** 0.96 (95% CI: 0.93 to 0.98) | **Pooled specificity:** 0.36 (95% CI: 0.29 to 0.42)

| Test result                                    | Number of results per 1,000 patients tested (95% CI)                              |                                                                                   | Number of participants (studies) | Quality of the Evidence (GRADE)  |
|------------------------------------------------|-----------------------------------------------------------------------------------|-----------------------------------------------------------------------------------|----------------------------------|----------------------------------|
|                                                | Prevalence 25% <sup>1,2</sup> in intermediate-risk patients with suspected LE DVT | Prevalence 35% <sup>1,2</sup> in intermediate-risk patients with suspected LE DVT |                                  |                                  |
| <b>True positives</b>                          | <b>240</b> (233 to 245)                                                           | <b>336</b> (326 to 343)                                                           | 5253 (16)                        | ⊕⊕⊕○<br><b>MODERATE</b><br>a,b,c |
| <b>False negatives</b>                         | <b>10</b> (5 to 17)                                                               | <b>14</b> (7 to 24)                                                               |                                  |                                  |
| <b>True negatives</b>                          | <b>270</b> (217 to 315)                                                           | <b>234</b> (189 to 273)                                                           | 5253 (16)                        | ⊕⊕⊕○<br><b>MODERATE</b><br>a,b,c |
| <b>False positives</b>                         | <b>480</b> (435 to 533)                                                           | <b>416</b> (377 to 461)                                                           |                                  |                                  |
| Inconclusive test results                      | Not applicable                                                                    |                                                                                   | 5253 (16)                        |                                  |
| Complications arising from the diagnostic test | Not reported                                                                      |                                                                                   |                                  |                                  |

**CI:** Confidence interval

<sup>1</sup>Fancher T et al. BMJ 2004; 329(7470):821. Clinical PTP and rapid D-dimer testing; mean prevalence of DVT in accuracy studies 11%; mean prevalence of DVT in management studies 25%

<sup>2</sup>Disease prevalence applies to the index test in each pathway. Prevalence applied to the accuracy of each subsequent test depends on the result of the previous test in the pathway.

*Explanations*

- a. Certainty of evidence not downgraded for risk of bias, although few studies had a combination of reference standards that were judged to be acceptable by the panel.
- b. Minor inconsistency for sensitivity noted but judged to be insufficient to downgrade the certainty of evidence. Certainty of evidence was downgraded for serious unexplained inconsistency in specificity, with a range from 5.2% to 59.6%.
- c. Certainty of evidence was downgraded for indirectness in instances where this test was not the index test in a diagnostic pathway. There was a lack of data on the accuracy of this test following a previous test in a pathway. Thus, sensitivity and specificity used for modeling in these instances were based on the test accuracy of the individual test rather than using the test in a pathway.

## High risk (50% and 75%)

**Table S5. Proximal compression ultrasound test accuracy in high prevalence population**

[Click link for interactive summary of findings \(iSoF\) table.](#)

**Patient or population:** Patients with suspected lower extremity deep vein thrombosis

**New test:** Proximal CUS

**Setting:** Inpatient and outpatient

**Pooled sensitivity:** 0.90 (95% CI: 0.87 to 0.93) | **Pooled specificity:** 0.99 (95% CI: 0.98 to 0.99)

| Test result                                    | Number of results per 1,000 patients tested (95% CI)            |                                                                 | Number of participants (studies) | Quality of the Evidence (GRADE)      |
|------------------------------------------------|-----------------------------------------------------------------|-----------------------------------------------------------------|----------------------------------|--------------------------------------|
|                                                | Prevalence 50% <sup>1,2</sup> in patients with suspected LE DVT | Prevalence 75% <sup>1,2</sup> in patients with suspected LE DVT |                                  |                                      |
| <b>True positives</b>                          | <b>450</b> (435 to 465)                                         | <b>675</b> (653 to 698)                                         | 2889 (12)                        | ⊕⊕⊕⊕<br><b>HIGH</b> <sub>a,b,c</sub> |
| <b>False negatives</b>                         | <b>50</b> (35 to 65)                                            | <b>75</b> (52 to 97)                                            |                                  |                                      |
| <b>True negatives</b>                          | <b>495</b> (490 to 495)                                         | <b>248</b> (245 to 248)                                         | 2889 (12)                        | ⊕⊕⊕⊕<br><b>HIGH</b> <sub>a,b,c</sub> |
| <b>False positives</b>                         | <b>5</b> (5 to 10)                                              | <b>2</b> (2 to 5)                                               |                                  |                                      |
| Inconclusive test results                      | 19                                                              |                                                                 | 2908 (12)                        | -                                    |
| Complications arising from the diagnostic test | Not reported                                                    |                                                                 |                                  |                                      |

**CI:** Confidence interval

<sup>1</sup>Fancher T et al. BMJ 2004; 329(7470):821. Clinical PTP and rapid D-dimer testing; mean prevalence of DVT in accuracy studies 11%; mean prevalence of DVT in management studies 25%

<sup>2</sup>Disease prevalence applies to the index test in each pathway. Prevalence applied to the accuracy of each subsequent test depends on the result of the previous test in the pathway.

### Explanations

- Certainty of evidence not downgraded for risk of bias, although few studies had a combination of reference standards that were judged to be acceptable by the panel.
- Minor inconsistency for sensitivity noted but judged to be insufficient to downgrade the certainty of evidence. Minor inconsistency for specificity noted but judged to be insufficient to downgrade the certainty of evidence.
- Certainty of evidence was downgraded for indirectness in instances where this test was not the index test in a diagnostic pathway. There was a lack of data on the accuracy of this test following a previous test in a pathway. Thus, sensitivity and specificity used for modeling in these instances were based on the test accuracy of the individual test rather than using the test in a pathway.

**Table S6. Whole leg ultrasound test accuracy in high prevalence population**

[Click link for interactive summary of findings \(iSoF\) table.](#) Patient or population: Patients with suspected lower extremity deep vein thrombosis

**New test:** Whole Leg US

**Setting:** Inpatient and outpatient

**Pooled sensitivity:** 0.94 (95% CI: 0.91 to 0.96) | **Pooled specificity:** 0.97 (95% CI: 0.95 to 0.99)

| Test result                                    | Number of results per 1,000 patients tested (95% CI)            |                                                                 | Number of participants (studies) | Quality of the Evidence (GRADE)      |
|------------------------------------------------|-----------------------------------------------------------------|-----------------------------------------------------------------|----------------------------------|--------------------------------------|
|                                                | Prevalence 50% <sup>1,2</sup> in patients with suspected LE DVT | Prevalence 75% <sup>1,2</sup> in patients with suspected LE DVT |                                  |                                      |
| <b>True positives</b>                          | <b>470</b> (455 to 480)                                         | <b>705</b> (683 to 720)                                         | 1725 (10)                        | ⊕⊕⊕⊕<br><b>HIGH</b> <sup>a,b,c</sup> |
| <b>False negatives</b>                         | <b>30</b> (20 to 45)                                            | <b>45</b> (30 to 67)                                            |                                  |                                      |
| <b>True negatives</b>                          | <b>485</b> (475 to 495)                                         | <b>243</b> (238 to 248)                                         | 1725 (10)                        | ⊕⊕⊕⊕<br><b>HIGH</b> <sup>a,b,c</sup> |
| <b>False positives</b>                         | <b>15</b> (5 to 25)                                             | <b>7</b> (2 to 12)                                              |                                  |                                      |
| Inconclusive test results                      | 8                                                               |                                                                 | 1733 (10)                        |                                      |
| Complications arising from the diagnostic test | Not reported                                                    |                                                                 |                                  |                                      |

**CI:** Confidence interval

<sup>1</sup>Fancher T et al. BMJ 2004; 329(7470):821. Clinical PTP and rapid D-dimer testing; mean prevalence of DVT in accuracy studies 11%; mean prevalence of DVT in management studies 25%

<sup>2</sup>Disease prevalence applies to the index test in each pathway. Prevalence applied to the accuracy of each subsequent test depends on the result of the previous test in the pathway.

*Explanations*

a. Certainty of evidence not downgraded for risk of bias, although few studies had a combination of reference standards that were judged to be acceptable by the panel.

b. Minor inconsistency for sensitivity noted but judged to be insufficient to downgrade the certainty of evidence. Minor inconsistency for specificity noted but judged to be insufficient to downgrade the certainty of evidence.

c. Certainty of evidence was downgraded for indirectness in instances where this test was not the index test in a diagnostic pathway. There was a lack of data on the accuracy of this test following a previous test in a pathway. Thus, sensitivity and specificity used for modeling in these instances were based on the test accuracy of the individual test rather than using the test in a pathway.

**Table S7. Serial Ultrasound test accuracy in high prevalence population**

[Click link for interactive summary of findings \(iSoF\) table.](#)

**Patient or population:** Patients with suspected lower extremity deep vein thrombosis

**New test:** Serial US

**Setting:** Inpatient and outpatient

**Pooled sensitivity:** 0.98 (95% CI: 0.96 to 0.99) | **Pooled specificity:** 0.998 (95% CI: 0.993 to 0.999)

| Test result                                    | Number of results per 1,000 patients tested (95% CI)            |                                                                 | Number of participants (studies) | Quality of the Evidence (GRADE) |
|------------------------------------------------|-----------------------------------------------------------------|-----------------------------------------------------------------|----------------------------------|---------------------------------|
|                                                | Prevalence 50% <sup>1,2</sup> in patients with suspected LE DVT | Prevalence 75% <sup>1,2</sup> in patients with suspected LE DVT |                                  |                                 |
| True positives                                 | 490 (480 to 495)                                                | 735 (720 to 742)                                                | 2415 (6)                         | ⊕⊕⊕⊕<br>HIGH <sup>a,b,c</sup>   |
| False negatives                                | 10 (5 to 20)                                                    | 15 (8 to 30)                                                    |                                  |                                 |
| True negatives                                 | 499 (497 to 500)                                                | 250 (248 to 250)                                                | 2415 (6)                         | ⊕⊕⊕⊕<br>HIGH <sup>a,b,c</sup>   |
| False positives                                | 1 (0 to 3)                                                      | 0 (0 to 2)                                                      |                                  |                                 |
| Inconclusive test results                      | 0                                                               |                                                                 | 2415 (6)                         |                                 |
| Complications arising from the diagnostic test | Not reported                                                    |                                                                 |                                  |                                 |

**CI:** Confidence interval

<sup>1</sup>Fancher T et al. BMJ 2004; 329(7470):821. Clinical PTP and rapid D-dimer testing; mean prevalence of DVT in accuracy studies 11%; mean prevalence of DVT in management studies 25%

<sup>2</sup>Disease prevalence applies to the index test in each pathway. Prevalence applied to the accuracy of each subsequent test depends on the result of the previous test in the pathway.

*Explanations*

- a. Certainty of evidence not downgraded for risk of bias, although few studies had a combination of reference standards that were judged to be acceptable by the panel.
- b. Minor inconsistency for sensitivity noted but judged to be insufficient to downgrade the certainty of evidence. Minor inconsistency for specificity noted but judged to be insufficient to downgrade the certainty of evidence.
- c. Certainty of evidence was downgraded for indirectness in instances where this test was not the index test in a diagnostic pathway. There was a lack of data on the accuracy of this test following a previous test in a pathway. Thus, sensitivity and specificity used for modeling in these instances were based on the test accuracy of the individual test rather than using the test in a pathway.



**Table S8. D-dimer test accuracy in high prevalence population**

[Click link for interactive summary of findings \(iSoF\) table.](#)

**Patient or population:** Patients with suspected lower extremity deep vein thrombosis

**New test:** D-dimer

**Setting:** Inpatient and outpatient

**Pooled sensitivity:** 0.96 (95% CI: 0.93 to 0.98) | **Pooled specificity:** 0.36 (95% CI: 0.29 to 0.42)

| Test result                                    | Number of results per 1,000 patients tested (95% CI)            |                                                                 | Number of participants (studies) | Quality of the Evidence (GRADE)   |
|------------------------------------------------|-----------------------------------------------------------------|-----------------------------------------------------------------|----------------------------------|-----------------------------------|
|                                                | Prevalence 50% <sup>1,2</sup> in patients with suspected LE DVT | Prevalence 75% <sup>1,2</sup> in patients with suspected LE DVT |                                  |                                   |
| True positives                                 | 480 (465 to 490)                                                | 720 (698 to 735)                                                | 5253 (16)                        | ⊕⊕⊕○<br>MODERATE <sup>a,b,c</sup> |
| False negatives                                | 20 (10 to 35)                                                   | 30 (15 to 52)                                                   |                                  |                                   |
| True negatives                                 | 180 (145 to 210)                                                | 90 (73 to 105)                                                  | 5253 (16)                        | ⊕⊕⊕○<br>MODERATE <sup>a,b,c</sup> |
| False positives                                | 320 (290 to 355)                                                | 160 (145 to 177)                                                |                                  |                                   |
| Inconclusive test results                      | Not applicable                                                  |                                                                 | 5253 (16)                        |                                   |
| Complications arising from the diagnostic test | Not reported                                                    |                                                                 |                                  |                                   |

**CI:** Confidence interval

<sup>1</sup>Fancher T et al. BMJ 2004; 329(7470):821. Clinical PTP and rapid D-dimer testing; mean prevalence of DVT in accuracy studies 11%; mean prevalence of DVT in management studies 25%

<sup>2</sup>Disease prevalence applies to the index test in each pathway. Prevalence applied to the accuracy of each subsequent test depends on the result of the previous test in the pathway.

*Explanations*

- a. Certainty of evidence not downgraded for risk of bias, although few studies had a combination of reference standards that were judged to be acceptable by the panel.
- b. Minor inconsistency for sensitivity noted but judged to be insufficient to downgrade the certainty of evidence. Certainty of evidence was downgraded for serious unexplained inconsistency in specificity, with a range from 5.2% to 59.6%.
- c. Certainty of evidence was downgraded for indirectness in instances where this test was not the index test in a diagnostic pathway. There was a lack of data on the accuracy of this test following a previous test in a pathway. Thus, sensitivity and specificity used for modeling in these instances were based on the test accuracy of the individual test rather than using the test in a pathway.

### Supplement 3. List of excluded studies during full-text review (n=245)

#### Duplicate (n=1)

1. Fisher BWM, S. R.; McAlister, F. A. Clinical prediction of deep venous thrombosis using two risk assessment methods in combination with rapid quantitative D-dimer testing. *American Journal of Medicine*. 2002;112(3):198-203.

#### Incorrect study design/type (n=67)

1. Ahearn GS, Bounameaux H. The role of the D-dimer in the diagnosis of venous thromboembolism. *Seminars in Respiratory & Critical Care Medicine*. 2000;21(6):521-536.
2. Alizadeh LB, D. M.; Taddesse-Heath, L. The value of D-dimer in evaluating patients with suspected deep venous thrombosis in a predominantly African-American patient population. *Laboratory Investigation*. 2011;91:285A.
3. Bates SM, Grand'Maison A, Johnston M. A negative quantitative latex D-dimer assay helped to rule out venous thromboembolism. *Evidence-Based Medicine*. 2001;6(6):188.
4. Bates SMJ, M.; Ali, E.; Ginsberg, J. S. Retrospective evaluation of an immunoturbidometric D-dimer assay as a stand-alone test to exclude venous thromboembolism. *Journal of Thrombosis and Haemostasis*. 2009;7 (S2):1107-1108.
5. Bates SM, Kearon C, Julian JA, et al. A negative immunoturbidometric D-dimer as a stand-alone test excludes pulmonary embolism. *Journal of Thrombosis and Haemostasis*. 2009;7 (S2):493.
6. Carrier M, Lee AYY, Bates SM, Anderson DR, Wells PS. Accuracy and usefulness of a clinical prediction rule and D-dimer testing in excluding deep vein thrombosis in cancer patients. *Thrombosis Research*. 2008;123(1):177-183.
7. Casals-Sole JB, D.; Camp, J.; Lozano, N.; Ballester, E.; Escolar, G. A normal D-Dimer value, measured by a high sensitivity assay, rule out a suspected Venous Thromboembolism episode independently of pretest clinical probability. *Haematologica*. 2009;94:408-409.
8. Cogo AL, A. W.; Prandoni, P.; Hirsh, J. Distribution of thrombosis in patients with symptomatic deep vein thrombosis. Implications for simplifying the diagnostic process with compression ultrasound. *Archives of Internal Medicine*. 1993;153(24):2777-2780.
9. Cornuz JP, S. D.; Polak, J. F. Deep venous thrombosis: complete lower extremity venous US evaluation in patients without known risk factors--outcome study. *Radiology*. 1999;211(3):637-641.
10. Curry NK, D. Venous thromboembolism: The role of the clinician. *Journal of the Royal College of Physicians of Edinburgh*. 2009;39(3):243-246.
11. Dany FK, M.; Brutus, P. Venous Doppler ultrasonography: Methods, indications, and limits. [French]. *Archives des Maladies du Coeur et des Vaisseaux*. 1981;74(7):853-862.
12. De Bastos MMB, M. R. D.; Pessoa, P. C. H.; Bogutchi, T.; Carneiro-Proietti, A. B. F.; Rezende, S. M. Managing suspected venous thromboembolism in a mixed primary and secondary care setting using standard clinical assessment and D-dimer in a noninvasive diagnostic strategy. *Blood Coagulation and Fibrinolysis*. 2008;19(1):48-54.
13. Deng FZ, N.; Zheng, Y.; Zhang, N.; Tang, Q.; Deng, X. The IRTI and CPUS double-blind controlled clinical study on DVT. *Respirology*. 2011;16:300.
14. Eissa DGG, M. F.; Osman, A.; Mahmoud, H. M. D-dimer, P-selectin and Microparticles are superior to duplex ultrasound in the diagnosis of DVT. *Journal of Thrombosis and Haemostasis*. 2013;11:1045-1046.
15. Farm MS, A.; Onelov, L.; Jarnberg, I.; Eintrei, J.; Kallner, A.; Antovic, J. P. Evaluation of different assays of D-DIMER and soluble fibrin in emergency department patients with suspected venous thromboembolism. *Journal of Thrombosis and Haemostasis*.

- 2015;13:333.
16. Garcia NDM, M. D.; Ebaugh, J. L.; Shah, S.; Blackburn, D.; Astleford, P.; Matsumura, J. S.; Yao, J. S.; Pearce, W. H. Is bilateral ultrasound scanning of the legs necessary for patients with unilateral symptoms of deep vein thrombosis? *Journal of Vascular Surgery*. 2001;34(5):792-797.
  17. Ghumro MA-I, A.; Altaf, S.; Sieber, C.; Keidan, J. Quantitative plasma d-dimer levels among patients suspected for pulmonary embolism and deep venous thromboses. *Haematologica*. 2010;95:290.
  18. Gupta SF, E.; Vadher, B. Evaluation of deep vein thrombosis (DVT) diagnostic strategy using combined D-dimer and strain gauge plethysmography(venometer). *British Journal of Haematology*. 2009;145:27.
  19. Harenberg JG, L.; Marx, S.; Weiss, C. Analysis of concomitant factors in combination with positive D-Dimer to improve probability for diagnosis of deep vein thrombosis or pulmonary embolism. *Hamostaseologie*. 2010;30 (1):A41.
  20. Horner DH, K.; Body, R.; Jones, S.; Nash, M. J.; Mackway-Jones, K. Single whole-leg compression ultrasound for exclusion of deep vein thrombosis in symptomatic ambulatory patients: a prospective observational cohort study. *British Journal of Haematology*. 2014;164(3):422-430.
  21. Hyder SJ, Ockelford PA, Tagelagi M, Jackson SR, Young LK. Validity of the primary care rule for risk stratification in patients with suspected DVT in auckland new zealand. *Journal of Thrombosis and Haemostasis*. 2013;11:66.
  22. Kocakoc EB, S.; Dogra, V. S. Utility of venous compression in deep venous thrombosis evaluation revisited. *Bratislavske Lekarske Listy*. 2012;113(7):417-420.
  23. Lapner SLDTL, L. A.; Bates, S. M.; Julian, J.; Douketis, J. D.; Parpia, S.; Schulman, S.; Kearon, C. Positive predictive value of progressively elevated D-dimer levels in patients with a suspected first deep vein thrombosis. *Blood Conference: 54th Annual Meeting of the American Society of Hematology, ASH*. 2012;120(21).
  24. Legnani CC, M.; Sartori, M.; Cosmi, B.; Palareti, G. Evaluation of a new quantitative highly sensitive latex D-dimer (Dd) assay in patients with clinically suspected deep vein thrombosis (DVT). *Biochimica Clinica*. 2012;36 (6):565.
  25. Legnani CC, M.; Cavallaroni, K.; Roderigo, G.; Cavazza, S.; Valdre, L.; Amato, A.; Palareti, G. D-Dimer (DD) levels at diagnosis in relation to the site and extension of leg deep vein thrombosis (DVT). *Journal of Thrombosis and Haemostasis*. 2009;7 (S2):799.
  26. Marlar RA. D-dimer: establishing a laboratory assay for ruling out venous thrombosis. *Mlo: Medical Laboratory Observer*. 2002;34(11):28-32.
  27. Swallow GAT, Z.; Cunningham, L.; Pavord, S. Prospective study to evaluate the role of D-Dimers in patients with moderate Wells clinical probability score. *British Journal of Haematology*. 2009;145:37.
  28. Wells PSA, D. R.; Ginsberg, J. Assessment of deep vein thrombosis or pulmonary embolism by the combined use of clinical model and noninvasive diagnostic tests. *Seminars in Thrombosis & Hemostasis*. 2000;26(6):643-656.
  29. Weber J. [Phlebological diagnosis. Phlebography of the veins of the lower extremity]. *Zentralblatt fur Chirurgie*. 2001;126(6):466-471.
  30. Waltering AP, R.; Franz, H.; Sawicki, P. T. [Evaluation of an internal guideline for the diagnostics of deep vein thrombosis]. *Medizinische Klinik*. 2007;102(8):612-616.
  31. Tan HCL, M. C.; Choo, M.; Tay, M. B.; Choo, H. F.; Lee, S. S. Diagnosis of deep vein thrombosis using duplex ultrasonography. *Singapore Medical Journal*. 1995;36(5):491-494.
  32. Strong JP, N.; Briggs, H.; Clarke-Drury, R.; Coultas, K.; Dent, J.; Eggleston, J.; Frimpong, V.; Thornton, D. Clinical validity of a quantitative point of care d-dimer assay in an acute

- ambulatory DVT service. *Journal of Thrombosis and Haemostasis*. 2013;11:601.
33. Spanuth EI, B.; Giannitsis, E. A comparative evaluation of PATHFAS T D-Dimer assay and VIDAS D-Dimer exclusion in emergency patients with post-hoc confirmed pulmonary embolism. *Clinical Chemistry*. 2012;1):A197.
  34. Sidelmann JJG, J.; Jespersen, J. Diagnostic performance of AQT90 FLEX D-Dimer in patients suspected for deep venous thrombosis - Comparison with four well-established D-dimer tests. *Journal of Thrombosis and Haemostasis*. 2009;7 (S2):801.
  35. Sheiman RGM, C. R. Clinically suspected pulmonary embolism: use of bilateral lower extremity US as the initial examination--a prospective study. *Radiology*. 1999;212(1):75-78.
  36. Sharma AS, N.; Pavelock, N.; Genzer, O.; Garnes, P.; Fernaine, G. Positive predictive values of positive D-dimer levels in venous thromboembolic events diagnosed by CT angiography, venous duplex, and V/Q scan. *Journal of Investigative Medicine*. 2015;63 (3):578-579.
  37. Seidel AC, Cavalheri G, Jr., Miranda F, Jr. The role of duplex ultrasonography in the diagnosis of lower-extremity deep vein thrombosis in non-hospitalized patients. *International Angiology*. 2008;27(5):377-384.
  38. Seashore JF, M.; Epelbaum, O. Use of an objective simplified wells score with or without age-adjusted D-dimer measurement to clinically exclude pulmonary embolism in hospitalized patients in the era of routine prophylaxis. *American Journal of Respiratory and Critical Care Medicine Conference: American Thoracic Society International Conference, ATS*. 2015;191(no pagination).
  39. Sabatini SG, L.; Vitale, J.; Mumoli, N.; Cei, M. A probabilistic approach to the diagnosis of deep venous thrombosis in hospitalized patients. *Italian Journal of Medicine*. 2013;7:108.
  40. Rosa-Jimenez FC-A, A.; Lozano-Rodriguez, A.; Rosa-Jimenez, A.; Duro-Lopez, M. C.; Martin-Moreno, P.; Roman-Navarro, P.; Hoyo-Rodriguez, F. J. Combination of the clinical decision rules and D Dimer for the exclusion of proximal DVT in a hospital emergency department. *European Journal of Internal Medicine*. 2013;24:e44.
  41. Prandoni PL, A. W.; Prins, M. H.; Bernardi, E.; Marchiori, A.; Bagatella, P.; Frulla, M.; Mosenza, L.; Tormene, D.; Piccioli, A.; Simioni, P.; Girolami, A. Residual venous thrombosis as a predictive factor of recurrent venous thromboembolism.[Summary for patients in *Ann Intern Med*. 2002 Dec 17;137(12):I32; PMID: 12484741]. *Annals of Internal Medicine*. 2002;137(12):955-960.
  42. Prandoni P, Cogo A, Bernardi E, et al. A simple ultrasound approach for detection of recurrent proximal-vein thrombosis. *Circulation*. 1993;88(4 Pt 1):1730-1735.
  43. Park GYI, S.; Kim, Y. J. Diagnostic value of D-dimer for venous thromboembolism in Korean patients with a brain lesion. *Cerebrovascular Diseases*. 2014;38:50.
  44. Oh SYP, S. J.; Park, I. K.; Lim, G. J.; Jun, H. J. Role of D-dimer in advanced cancer patients receiving end of life care. *Journal of Clinical Oncology Conference*. 2014;32(15 SUPPL. 1).
  45. L. E. Gal G; Carrier MK, M. J.; Betancourt, M. T.; Kahn, S. R.; Wells, P. S.; Anderson, D. A.; Chagnon, I.; Solymoss, S.; Crowther, M.; Righini, M.; Delluc, A.; White, R. H.; Vickers, L.; Rodger, M. Residual vein obstruction as a predictor for recurrent thromboembolic events after a first unprovoked episode: data from the REVERSE cohort study. *Journal of Thrombosis & Haemostasis*. 2011;9(6):1126-1132.
  46. Arcelus JI, Caprini JA, Monreal M, Suarez C, Gonzalez-Fajardo J. The management and outcome of acute venous thromboembolism: A prospective registry including 4011 patients. *Journal of Vascular Surgery*. 2003;38(5):916-922.
  47. Barrellier MTB, J. L.; Vignon, C.; Rousseau, J. F.; Aubriot, J. H.; Vielpeau, C. [Detection of deep vein thrombosis of the limbs by ultrasound in orthopedic and traumatologic

- surgery. Results of 1647 studied patients]. *Revue de Chirurgie Orthopedique et Reparatrice de l Appareil Moteur*. 1994;80(8):711-719.
48. Bounameaux H. Value of plasma D-dimer for diagnosis of venous thromboembolism. [French]. *Sang Thrombose Vaisseaux*. 1992;4(4):255-259.
  49. Buller HRTC-H, A. J.; Hoes, A. W.; Joore, M. A.; Moons, K. G.; Oudega, R.; Prins, M. H.; Stoffers, H. E.; Toll, D. B.; van der Velde, E. F.; van Weert, H. C.; Amuse Investigators. Safely ruling out deep venous thrombosis in primary care.[Summary for patients in Ann Intern Med. 2009 Feb 17;150(4):I-36; PMID: 19221372]. *Annals of Internal Medicine*. 2009;150(4):229-235.
  50. Carrier M, Le Gal G, Bates SM, Anderson DR, Wells PS. D-dimer testing is useful to exclude deep vein thrombosis in elderly outpatients. *Journal of Thrombosis & Haemostasis*. 2008;6(7):1072-1076.
  51. Couturaud FP, F.; Meyer, G.; Girard, P.; Le Gal, G.; Musset, D.; Simonneau, G.; Mottier, D.; Leroyer, C. Effect of age on the performance of a diagnostic strategy based on clinical probability, spiral computed tomography and venous compression ultrasonography: the ESSEP study. *Thrombosis & Haemostasis*. 2005;93(3):605-609.
  52. de Oliveira AF, G. J.; Vidal, E. A.; Stalke, P. S.; Baroncini, L. A. Duplex scan in patients with clinical suspicion of deep venous thrombosis. *Cardiovascular Ultrasound*. 2008;6:53.
  53. Dewar CS, C.; Jamieson, K.; Rogers, S. Emergency department nurse-based outpatient diagnosis of DVT using an evidence-based protocol. *Emergency Medicine Journal*. 2008;25(7):411-416.
  54. Gibson NSS, S. M.; Kheir, D. Y.; Beyer-Westendorf, J.; Gallus, A. S.; McRae, S.; Schutgens, R. E.; Piovela, F.; Gerdes, V. E.; Buller, H. R. Safety and sensitivity of two ultrasound strategies in patients with clinically suspected deep venous thrombosis: a prospective management study. *Journal of Thrombosis & Haemostasis*. 2009;7(12):2035-2041.
  55. Jiang YL, J.; Liu, Y.; Zhang, W. Diagnostic accuracy of deep vein thrombosis is increased by analysis using combined optimal cut-off values of postoperative plasma D-dimer levels. *Experimental and Therapeutic Medicine*. 2016;11(5):1716-1720.
  56. Sartori MC, B.; Legnani, C.; Conti, E.; Valdre, L.; Palareti, G. Wells rule and D-dimer for the diagnosis of isolated distal deep vein thrombosis. *Pathophysiology of Haemostasis and Thrombosis*. 2010;37:A50.
  57. Mayer W. [Clinical appearance and diagnostic tools in suspected deep-vein thrombosis]. *Wiener Medizinische Wochenschrift*. 2005;155(1-2):3-6.
  58. Prandoni PL, A. W. New developments in noninvasive diagnosis of deep vein thrombosis of the lower limbs. *Ricerca in Clinica e in Laboratorio*. 1990;20(1):11-17.
  59. Schellong SM, Schwarz T, Pudollek T, Schmidt B, Schroeder HE. Complete compression ultrasound for the diagnosis of proximal and distal deep venous thrombosis--a retrospective outcome study. *Vasa*. 2001;30(4):253-257.
  60. Subramaniam RMH, R.; Chou, T.; Cox, K.; Davis, G.; Swarbrick, M. Deep venous thrombosis: withholding anticoagulation therapy after negative complete lower limb US findings. *Radiology*. 2005;237(1):348-352.
  61. Torkzad MRB, S.; Blomqvist, L. [Deep venous thrombosis of the lower extremity. Ultrasonography should replace phlebography as first line diagnostic imaging]. *Lakartidningen*. 2004;101(36):2716-2718.
  62. Vucaj-Cirilovic VP, K.; Nikolic, O.; Til, V.; Niciforovic, D.; Hadnadev, D. [Duplex Doppler ultrasonography in the diagnosis of deep venous thrombosis of the lower extremities]. *Medicinski Pregled*. 2006;59(1-2):11-14.
  63. Cini ML, C.; Frascaro, M.; Cappelli, C.; Sartori, M.; Cosmi, B. Evaluation of a chemiluminescent immunoassay, the HemosIL AcuStar D-Dimer, in outpatients with clinically suspected deep venous thrombosis. *International Journal of Laboratory*

- Hematology*. 2015;37(6):e172-174.
64. Fobbe FK, H. C.; el Bedewi, M.; Heidt, P.; Boese-Landgraf, J.; Wolf, K. J. [Diagnosis of deep venous thrombosis of the leg using color-coded duplex sonography]. *Rofo: Fortschritte auf dem Gebiete der Rontgenstrahlen und der Nuklearmedizin*. 1989;151(5):569-573.
  65. Fobbe FR-T, M.; von Gemmeren, D.; Hartmann, C. A.; Kania, U.; Wolf, K. J. [Age determination of venous thrombi by ultrasound]. *Rofo: Fortschritte auf dem Gebiete der Rontgenstrahlen und der Nuklearmedizin*. 1991;155(4):344-348.
  66. Elias AB, J. L.; Lecorff, G.; Lagrange, G.; Benichou, M.; Serradimigni, A. [Value and place of real-time ultrasonic diagnosis combined with continuous-wave Doppler in the diagnosis and follow-up of thromboembolic disease]. *Journal des Maladies Vasculaires*. 1987;12(3):246-248.
  67. Marchena Yglesias PJNR, J. A.; Serrano Martinez, S.; Belinchon Moya, O.; Cortes Carmona, A.; Diaz de Tuesta, A.; Bruscas Alijarde, M. J.; Ruiz Ribo, M. D. [Acute-phase reactants and markers of inflammation in venous thromboembolic disease: correlation with clinical and evolution parameters]. *Anales de Medicina Interna*. 2006;23(3):105-110.

### **Incorrect population (n=17)**

1. Barnes RWW, K. K.; Hoak, J. C. Fallibility of the clinical diagnosis of venous thrombosis. *JAMA*. 1975;234(6):605-607.
2. Boneu BB, G.; Pelzer, H.; Sie, P.; Boccalon, H. D-Dimers, thrombin antithrombin III complexes and prothrombin fragments 1+2: diagnostic value in clinically suspected deep vein thrombosis. *Thrombosis & Haemostasis*. 1991;65(1):28-31.
3. Chengelis DLB, P. J.; Glover, J. L.; Brown, O. W.; Ranval, T. J. Progression of superficial venous thrombosis to deep vein thrombosis. *Journal of Vascular Surgery*. 1996;24(5):745-749.
4. Emelianov SYC, X.; O'Donnell, M.; Knipp, B.; Myers, D.; Wakefield, T. W.; Rubin, J. M. Triplex ultrasound: elasticity imaging to age deep venous thrombosis. *Ultrasound in Medicine & Biology*. 2002;28(6):757-767.
5. Johnson JCB, M. D.; McCullough, N.; Smith, S. CT lower extremity venography in suspected pulmonary embolism in the ED. *Emergency Radiology*. 2006;12(4):160-163.
6. Righini MLG, G.; Aujesky, D.; Roy, P. M.; Sanchez, O.; Verschuren, F.; Kossovsky, M.; Bressollette, L.; Meyer, G.; Perrier, A.; Bounameaux, H. Complete venous ultrasound in outpatients with suspected pulmonary embolism. *Journal of Thrombosis & Haemostasis*. 2009;7(3):406-412.
7. Yamada NH, K.; Ota, S.; Nakamura, M.; Sato, K.; Ikura, M.; Suzuki, T.; Kaise, T.; Nakajima, H.; Ito, M. Occurrence of Deep Vein Thrombosis among Hospitalized Non-Surgical Japanese Patients. *Avd*. 2015;8(3):203-209.
8. Winsor DW, T.; Mikail, A. Comparison of various noninvasive techniques for evaluating deep venous thrombosis. *Angiology*. 1991;42(10):779-787.
9. Westrich GHA, M. L.; Tarantino, S. J.; Ghelman, B.; Schneider, R.; Laskin, R. S.; Haas, S. B.; Sculco, T. P. Ultrasound screening for deep venous thrombosis after total knee arthroplasty. 2-year reassessment. *Clinical Orthopaedics & Related Research*. 1998(356):125-133.
10. Ray PB, B.; Birolleau, S.; Marx, J. S.; Arock, M.; Riou, B. Referent d-dimer enzyme-linked immunosorbent assay testing is of limited value in the exclusion of thromboembolic disease: result of a practical study in an ED. *American Journal of Emergency Medicine*. 2006;24(3):313-318.
11. Peterson DAK, E. A.; Wakefield, T. W.; Knipp, B. S.; Forauer, A. R.; Bailey, B. J.; Sullivan, V. V.; Proctor, M. C.; Henke, P. K.; Greenfield, L. J.; Stanley, J. C.; Upchurch, G. R., Jr. Computed tomographic venography is specific but not sensitive for diagnosis of acute lower-

- extremity deep venous thrombosis in patients with suspected pulmonary embolus. *Journal of Vascular Surgery*. 2001;34(5):798-804.
12. Lyall HDP, P.; Wimperis, J. Z. Age is associated with increased D-dimer levels, Wells score and imaging referrals in patients with suspected deep vein thrombosis. *British Journal of Haematology*. 2011;153:75.
  13. Lensing AWD, C. I.; McGrath, F. P.; Cogo, A.; Sabine, M. J.; Ginsberg, J.; Prandoni, P.; Turpie, A. G.; Hirsh, J. A comparison of compression ultrasound with color Doppler ultrasound for the diagnosis of symptomless postoperative deep vein thrombosis. *Archives of Internal Medicine*. 1997;157(7):765-768.
  14. Kohler AH, R.; Platz, A.; Bino, M. Diagnostic value of duplex ultrasound and liquid crystal contact thermography in preclinical detection of deep vein thrombosis after proximal femur fractures. *Archives of Orthopaedic & Trauma Surgery*. 1998;117(1-2):39-42.
  15. Azarbal AR, S.; Lewis, J.; Urankar, R.; Moseley, S.; Landry, G.; Moneta, G. Duplex ultrasound screening detects high rates of deep vein thromboses in critically ill trauma patients. *Journal of Vascular Surgery*. 2011;54(3):743-747; discussion 747-748.
  16. Elias AC, D.; Victor, G.; Elias, M.; Arnaud, C.; Juchet, H.; Ducasse, J. L.; Didier, A.; Colin, C.; Rousseau, H.; Nguyen, F.; Joffre, F. Diagnostic performance of complete lower limb venous ultrasound in patients with clinically suspected acute pulmonary embolism.[Erratum appears in *Thromb Haemost*. 2004 Mar;91(3):635]. *Thrombosis & Haemostasis*. 2004;91(1):187-195.
  17. Freyburger GT, H.; Labrousche, S.; Gauthier, P.; Javorschi, S.; Grenier, N. Rapid ELISA D-dimer testing in the exclusion of venous thromboembolism in hospitalized patients. *Clinical & Applied Thrombosis/Hemostasis*. 2000;6(2):77-81.

#### **No index diagnostic tests of interest (n=24)**

1. Ascher E, Depippo PS, Hingorani A, Yorkovich W, Salles-Cunha S. Does repeat duplex ultrasound for lower extremity deep vein thrombosis influence patient management? *Vascular & Endovascular Surgery*. 2004;38(6):525-531.
2. Fraser DGM, A. R.; Morgan, P. S.; Martel, A. L.; Davidson, I. Diagnosis of lower-limb deep venous thrombosis: a prospective blinded study of magnetic resonance direct thrombus imaging.[Summary for patients in *Ann Intern Med*. 2002 Jan 15;136(2):126; PMID: 11928733]. *Annals of Internal Medicine*. 2002;136(2):89-98.
3. Girard P, Sanchez O, Leroyer C, et al. Deep venous thrombosis in patients with acute pulmonary embolism: Prevalence, risk factors, and clinical significance. *Chest*. 2005;128(3):1593-1600.
4. Schouten HJ, Koek HL, Oudega R, van Delden JJ, Moons KG, Geersing GJ. Validation of the Oudega diagnostic decision rule for diagnosing deep vein thrombosis in frail older out-of-hospital patients. *Family Practice*. 2015;32(1):120-125.
5. Siau KD, A.; Laversuch, C. J. Is there still a role for computerized strain gauge plethysmography in the assessment of patients with suspected deep vein thrombosis? *Qjm*. 2010;103(4):259-264.
6. Stevens SME, C. G.; Chan, K. J.; Egger, M. J.; Ahmed, K. M. Withholding anticoagulation after a negative result on duplex ultrasonography for suspected symptomatic deep venous thrombosis. *Annals of Internal Medicine*. 2004;140(12):985-991.
7. Amin MAK, M. Z.; Khan, M. A.; Tariq, N. A. Diagnosis of deep vein thrombosis in the leg by using colour coded duplex sonography. *Journal of Ayub Medical College, Abbottabad: JAMC*. 2001;13(3):22-23.
8. Sufian S. Noninvasive vascular laboratory diagnosis of deep venous thrombosis. *American Surgeon*. 1981;47(6):254-258.
9. Sumner DSL, A. Reliability of Doppler ultrasound in the diagnosis of acute venous

- thrombosis both above and below the knee. *American Journal of Surgery*. 1979;138(2):205-210.
10. Subramaniam RM, Snyder B, Heath R, Tawse F, Sleight J. Diagnosis of lower limb deep venous thrombosis in emergency department patients: performance of Hamilton and modified Wells scores. *Annals of Emergency Medicine*. 2006;48(6):678-685.
  11. Ouriel K, Whitehouse Jr WM, Zarins CK. Combined use of Doppler ultrasound and phlebography in suspected deep venous thrombosis. *Surgery Gynecology and Obstetrics*. 1984;159(3):242-246.
  12. Naidich JBF, A. W.; Karp-Harman, H.; Karmel, M. I.; Tyma, C. G.; Stein, H. L. Contrast venography: reassessment of its role. *Radiology*. 1988;168(1):97-100.
  13. Becker DG, E.; Strauss, R.; Cidlinsky, K.; Tomandl, B.; Kalden-Nemeth, D.; Neureiter, D.; Lang, W.; Hahn, E. G. Color Doppler imaging versus phlebography in the diagnosis of deep leg and pelvic vein thrombosis. *Journal of Ultrasound in Medicine*. 1997;16(1):31-37.
  14. Feldtman RWB, C. J. Practical role for ultrasound in diagnosis of deep venous thrombosis of lower extremities. *Southern Medical Journal*. 1977;70(9):1043-1044.
  15. Jaques PFR, W. A.; Ely, C. A.; Johnson Jr, G. Doppler ultrasonic screening prior to venography for deep venous thrombosis. *American Journal of Roentgenology*. 1977;129(3):451-452.
  16. Ay C, Dunkler D, Marosi C, et al. Prediction of venous thromboembolism in cancer patients. *Blood*. 2010;116(24):5377-5382.
  17. Burnside PRG, E.; Kline, J. A. Indirect computed tomography venography: a report of vascular opacification. *Emergency Radiology*. 2010;17(3):195-201.
  18. Holden RWK, E. C.; Park, H. M.; Siddiqui, A. R.; Bendick, P. J.; Dilley, R. S.; Glover, J. L. Efficacy of noninvasive modalities of diagnosis of thrombophlebitis. *Radiology*. 1981;141(1):63-66.
  19. Lewis BDJ, E. M.; Welch, T. J.; Joyce, J. W.; Hallett, J. W.; Weaver, A. L. Diagnosis of acute deep venous thrombosis of the lower extremities: prospective evaluation of color Doppler flow imaging versus venography. *Radiology*. 1994;192(3):651-655.
  20. Pini MR, L.; Elgorni Basevi, P.; Quintavalla, R.; Larini, P. Instrumental diagnosis of deep venous thrombosis. Prospective study with non-invasive methods. [Italian]. *Acta bio-medica de L'Ateneo parmense : organo della Societa di medicina e scienze naturali di Parma*. 1983;54(5-6):417-426.
  21. Savy-Stortz CN-J, R.; Dubost, A.; Durand, D. V.; Levrat, R. [Venous ultrasonography coupled with continuous Doppler in the diagnosis of deep venous thrombosis of the lower limbs. Evaluation in symptomatic patients]. *Presse Medicale*. 1995;24(7):341-344.
  22. Dosick SMB, W. S. The role of Doppler ultrasound in acute deep vein thrombosis. *American Journal of Surgery*. 1978;136(2):265-268.
  23. Hanel KCA, W. M.; Reidy, N. C. The role of two noninvasive tests in deep venous thrombosis. *Annals of Surgery*. 1981;194(6):725-730.
  24. Krings WA, J.; Diederich, S.; Urhahne, S.; Vassallo, P.; Peters, P. E. [The diagnosis of deep venous thrombosis of the lower extremities using high-resolution real-time and CW-Doppler sonography. Accuracy and limitations]. *Radiologe*. 1990;30(11):525-531.

#### **Unacceptable reference standard (n=22)**

1. Baglin TP, C. R.; Luddington, R.; Baglin, C. Unprovoked recurrent venous thrombosis: prediction by D-dimer and clinical risk factors. *Journal of Thrombosis & Haemostasis*. 2008;6(4):577-582.
2. Bozic MB, A.; Stegnar, M. D-dimer, other markers of haemostasis activation and soluble adhesion molecules in patients with different clinical probabilities of deep vein



- thrombosis. *Thrombosis Research*. 2002;108(2-3):107-114.
3. Nelson CMW, G. S.; Silbaugh, T. R.; Cota, L. J. Improving D-dimer Positive Predictive Value for Outpatients with Suspected Deep Vein Thrombosis. *Permanente Journal*. 2009;13(1):4-7.
  4. Sidelmann JJG, J.; Larsen, A.; Overgaard, K.; Jespersen, J. Analytical and clinical validation of a new point-of-care testing system for determination of D-Dimer in human blood. *Thrombosis Research*. 2010;126(6):524-530.
  5. Smith RAR, S.; de Cossart, L. M. The diagnostic value of light reflection rheology for suspected deep vein thrombosis: a five-and-a-half year single centre experience. *Phlebology*. 2007;22(3):105-109.
  6. Abbasi S, Bolverdi E, Zare MA, Hafezimoghadam P, Fathi M, Farsi D, et al. Comparison of diagnostic value of conventional ultrasonography by emergency physicians with Doppler ultrasonography by radiology physicians for diagnosis of deep vein thrombosis. *Jpma*. 2012;62(461).
  7. Waser GK, S.; Wuillemin, W. A. Performance of the automated and rapid STA Liatest D-dimer on the STA-R analyzer. *Thrombosis Research*. 2005;116(2):165-170.
  8. Spritzer CENJ, J. J.; Sostman, H. D.; Coleman, R. E. Detection of deep venous thrombosis by magnetic resonance imaging. *Chest*. 1993;104(1):54-60.
  9. Schroeder PJD, E. Mechanical plethysmography and Doppler ultrasound. Diagnosis of deep-venous thrombosis. *Archives of Surgery*. 1982;117(3):300-303.
  10. Rosen MPS, R. G.; Weintraub, J.; McArdle, C. Compression sonography in patients with indeterminate or low-probability lung scans: lack of usefulness in the absence of both symptoms of deep-vein thrombosis and thromboembolic risk factors. *AJR American Journal of Roentgenology*. 1996;166(2):285-289.
  11. Nypaver TJS, A. D.; Kiell, C. S.; McPharlin, M.; Fenn, N.; Ernst, C. B. Outpatient duplex scanning for deep vein thrombosis: Parameters predictive of a negative study result. *Journal of Vascular Surgery*. 1993;18(5):821-826.
  12. Mousa AY, Broce M, De Wit D, Baskharoun M, Abu-Halimah S, Yacoub M, Bates MC. Appropriate use of venous imaging and analysis of the D-dimer/clinical probability testing paradigm in the diagnosis and location of deep venous thrombosis. *Annals of vascular surgery*. 2018 Jul 1;50:21-9.
  13. McClusky DR, D.; Stanton, P. E., Jr.; Lamis, P. A. Diagnosing deep vein thrombosis by Doppler ultrasound and impedance plethysmography. *Southern Medical Journal*. 1980;73(1):43-44.
  14. Lukaschek JS, H. R.; Vorburger, C.; Beer, J. H. Critical appraisal of the diagnostics of 270 consecutive cases of suspected venous thromboembolism and established consequences at a non-university center. *Swiss Medical Weekly*. 2001;131(45-46):653-658.
  15. Sevestre MAL, J.; Casez, P.; Bressollette, L.; Haddouche, M.; Pernod, G.; Quere, I.; Bosson, J. L. Outcomes for inpatients with normal findings on whole-leg ultrasonography: a prospective study. *American Journal of Medicine*. 2010;123(2):158-165.
  16. Poley RAN, J. L.; Sivilotti, M. L. Estimated effect of an integrated approach to suspected deep venous thrombosis using limited-compression ultrasound. *Academic Emergency Medicine*. 2014;21(9):971-980.
  17. Langsfeld MH, F. B.; Thorpe, L.; Auer, A. I.; Binnington, H. B.; Hurley, J. J.; Woods, J. J. Duplex B-mode imaging for the diagnosis of deep venous thrombosis. *Archives of Surgery*. 1987;122(5):587-591.
  18. Bates SM, Grand'Maison A, Johnston M, Naguit I, Kovacs MJ, Ginsberg JS. A latex D-dimer reliably excludes venous thromboembolism. *Archives of Internal Medicine*. 2001;161(3):447-453.
  19. Dautzat MML, J. P.; Charras, C.; Blin, B.; Domingo-Faye, M. M.; Sainte-Luce, P.; Domergue,

- A.; Lopez, F. M.; Janbon, C. Real-time B-mode ultrasonography for better specificity in the noninvasive diagnosis of deep venous thrombosis. *Journal of Ultrasound in Medicine*. 1986;5(11):625-631.
20. de Moerloose PR, G.; Arnout, J. Evaluation of a new quantitative highly sensitive D-dimer assay for exclusion of venous thromboembolism. *Journal of Thrombosis and Haemostasis*. 2009;7(9):1590-1591.
  21. Geersing GJT, D. B.; Janssen, K. J.; Oudega, R.; Blikman, M. J.; Wijland, R.; de Vooght, K. M.; Hoes, A. W.; Moons, K. G. Diagnostic accuracy and user-friendliness of 5 point-of-care D-dimer tests for the exclusion of deep vein thrombosis. *Clinical Chemistry*. 2010;56(11):1758-1766.
  22. Larsen TBS, E.; Christensen, C. S.; Laursen, B. Validity of D-dimer tests in the diagnosis of deep vein thrombosis: a prospective comparative study of three quantitative assays. *Journal of Internal Medicine*. 2002;252(1):36-40.

#### **Ineligible D-dimer assay/cutoff (n=40)**

1. Anderson DR, Kovacs MJ, Kovacs G, et al. Combined use of clinical assessment and d-dimer to improve the management of patients presenting to the emergency department with suspected deep vein thrombosis (the EDITED Study). *Journal of Thrombosis & Haemostasis*. 2003;1(4):645-651.
2. Arancibia FB, T. T.; Ewig, S.; Mensa, J.; Gonzalez, J.; Niederman, M. S.; Torres, A. The clinical usefulness of D-dimer testing in cancer patients with suspected deep venous thrombosis. *Archives of Internal Medicine*. 2002;162(16):1880-1884.
3. Aschwanden ML, K. H.; Jeanneret, C.; Gehrig, A.; Jaeger, K. A. The value of rapid D-dimer testing combined with structured clinical evaluation for the diagnosis of deep vein thrombosis. *Journal of Vascular Surgery*. 1999;30(5):929-935.
4. Bernardi EC, G.; Buller, H. R.; Siragusa, S.; Imberti, D.; Berchio, A.; Ghirarduzzi, A.; Verlato, F.; Anastasio, R.; Prati, C.; Piccioli, A.; Pesavento, R.; Bova, C.; Maltempo, P.; Zanatta, N.; Cogo, A.; Cappelli, R.; Bucherini, E.; Cuppini, S.; Noventa, F.; Prandoni, P.; Erasmus Study, Group. Serial 2-point ultrasonography plus D-dimer vs whole-leg color-coded Doppler ultrasonography for diagnosing suspected symptomatic deep vein thrombosis: a randomized controlled trial. *JAMA*. 2008;300(14):1653-1659.
5. Blattler WK, N.; Blattler, I. K. Practicability and quality of outpatient management of acute deep venous thrombosis. *Journal of Vascular Surgery*. 2000;32(5):855-860.
6. Blattler W, Martinez I, Blattler IK. Diagnosis of deep venous thrombosis and alternative diseases in symptomatic outpatients. *European Journal of Internal Medicine*. 2004;15(5):305-311.
7. Di Nisio MR, A. W.; Buller, H. R. Combined use of clinical pretest probability and D-dimer test in cancer patients with clinically suspected deep venous thrombosis. *Journal of Thrombosis & Haemostasis*. 2006;4(1):52-57.
8. Dryjski MOB-I, M. S.; Harris, L. M.; Hassett, J.; Janicke, D. Evaluation of a screening protocol to exclude the diagnosis of deep venous thrombosis among emergency department patients. *Journal of Vascular Surgery*. 2001;34(6):1010-1015.
9. Gardiner CPh, C.; Walford, C.; Machin, S. J.; Mackie, I. J. An evaluation of rapid D-dimer assays for the exclusion of deep vein thrombosis. *British Journal of Haematology*. 2005;128(6):842-848.
10. Lee AYJ, J. A.; Levine, M. N.; Weitz, J. I.; Kearon, C.; Wells, P. S.; Ginsberg, J. S. Clinical utility of a rapid whole-blood D-dimer assay in patients with cancer who present with suspected acute deep venous thrombosis. *Annals of Internal Medicine*. 1999;131(6):417-423.
11. Legnani CC, M.; Frascaro, M.; Roderigo, G.; Sartori, M.; Cosmi, B. Diagnostic Accuracy of a

- New d-Dimer Assay (Sclavo Auto d-Dimer) for Exclusion of Deep Vein Thrombosis in Symptomatic Outpatients. *Clinical & Applied Thrombosis/Hemostasis*. 2016;18:18.
12. Bradley MB, J.; Barker, H. D-dimer assay for deep vein thrombosis: its role with colour Doppler sonography. *Clinical Radiology*. 2000;55(7):525-527.
  13. Elf JLS, K.; Nilsson, C.; Svensson, P. J. Clinical probability assessment and D-dimer determination in patients with suspected deep vein thrombosis, a prospective multicenter management study. *Thrombosis Research*. 2009;123(4):612-616.
  14. Shitrit DL, H.; Huerta, M.; Rudensky, B.; Bargil-Shitrit, A.; Gutterer, N. Appropriate indications for venous duplex scanning based on D-dimer assay. *Annals of Vascular Surgery*. 2002;16(3):304-308.
  15. Anoop P, Chappell P, Kulkarni S, Shirley JA. Evaluation of an immunoturbidimetric D-dimer assay and pretest probability score for suspected venous thromboembolism in a district hospital setting. *Hematology*. 2009;14(5):305-310.
  16. Legnani CC, M.; Scarvelis, D.; Toulon, P.; Wu, J. R.; Palareti, G. Multicenter evaluation of a new quantitative highly sensitive D-dimer assay, the Hemosil D-dimer HS 500, in patients with clinically suspected venous thromboembolism. *Thrombosis Research*. 2010;125(5):398-401.
  17. Subramaniam RM, Chou T, Heath R, Allen R. Importance of pretest probability score and D-dimer assay before sonography for lower limb deep venous thrombosis. *AJR American Journal of Roentgenology*. 2006;186(1):206-212.
  18. Subramaniam RM, Heath R, Cox K, Chou T, Stewart J, Sleigh J. Does an immunochromatographic D-dimer exclude acute lower limb deep venous thrombosis? *Emergency Medicine Australasia*. 2006;18(5-6):457-463.
  19. Shitrit DH, J.; Raveh, D.; Rudensky, B. Diagnostic value of the D-dimer test in deep vein thrombosis: improved results by a new assay method and by using discriminate levels. *Thrombosis Research*. 2001;102(2):125-131.
  20. Leroyer CE, M.; Le Moigne, E.; Grimaux, M.; Cagnioncle, O.; Oger, E.; Bressollette, L.; Abgrall, J. F.; Amiral, J.; Mottier, D. Diagnostic value of a new sensitive membrane based technique for instantaneous D-dimer evaluation in patients with clinically suspected deep venous thrombosis. *Thrombosis & Haemostasis*. 1997;77(4):637-640.
  21. Schutgens RE, Esseboom EU, Haas FJ, Nieuwenhuis HK, Biesma DH. Usefulness of a semiquantitative D-dimer test for the exclusion of deep venous thrombosis in outpatients. *American Journal of Medicine*. 2002;112(8):617-621.
  22. Ruiz-Gimenez Arrieta NF, A.; Artieda, P.; Caballero, P.; Sanchez Molini, P.; Morales, M.; Suarez, C.; Dominguez, L.; Perez-Amor, E.; Roldan, J. Rapid D-dimer test combined a clinical model for deep vein thrombosis. Validation with ultrasonography and clinical follow-up in 383 patients. *Thrombosis and Haemostasis*. 2004;91(6):1237-1246.
  23. Lennox AFD, K. T.; Serunkuma, S.; Zarka, Z. A.; Daskalopoulou, S. E.; Nicolaidis, A. N. Combination of a clinical risk assessment score and rapid whole blood D-dimer testing in the diagnosis of deep vein thrombosis in symptomatic patients. *Journal of Vascular Surgery*. 1999;30(5):794-803.
  24. Bates SM, Kearon C, Crowther M, et al. A diagnostic strategy involving a quantitative latex D-dimer assay reliably excludes deep venous thrombosis. *Annals of Internal Medicine*. 2003;138(10):787-794.
  25. Escoffre-Barbe MO, E.; Leroyer, C.; Grimaux, M.; Le Moigne, E.; Nonent, M.; Bressollette, L.; Abgrall, J. F.; Soria, C.; Amiral, J.; Ill, P.; Clavier, J.; Mottier, D. Evaluation of a new rapid D-dimer assay for clinically suspected deep venous thrombosis (Liatest D-dimer). *American Journal of Clinical Pathology*. 1998;109(6):748-753.
  26. Aguilar Franco C, Martinez Benedicto A, Martinez Santabarbara A, et al. [Diagnostic value of D-dimer in patients with a low pretest probability of deep venous thrombosis of

- lower extremities]. *Medicina Clinica*. 2002;118(14):539-542.
27. Carter CJD, D. L.; Dawson, N.; Fowler, S.; Devine, D. V. Investigations into the clinical utility of latex D-dimer in the diagnosis of deep venous thrombosis. *Thrombosis & Haemostasis*. 1993;69(1):8-11, 24.
  28. Del Rio Sola MLF, J. A. G.; Pedrosa, M. M.; Gutierrez, V.; Carrera, S.; Puerta, C. V. Clinical evaluation of D-Dimer in the diagnosis of thromboembolic disease. [Spanish]. *Angiologia*. 1999;51(6):251-258.
  29. El Tabei LH, G.; Schurer-Maly, C.; Abholz, H. H. Accuracy in diagnosing deep and pelvic vein thrombosis in primary care: an analysis of 395 cases seen by 58 primary care physicians. *Deutsches Arzteblatt International*. 2012;109(45):761-766.
  30. Franco CAMB, A.; Martinez Santabrbara, A.; del Rio Mayor, C.; del Villar Sordo, V.; Vazquez Salvado, M.; Javier Rodriguez Recio, F. Diagnostic value of D-dimer in patients with a low pretest probability of deep venous thrombosis of lower extremities. *Medicina Clinica*. 2002;118(14):539-542.
  31. Horney EL, C. Evaluation of analyses to exclude suspected thrombosis. Don't rely on the D-dimer test!. [Swedish]. *Lakartidningen*. 1998;95(1-2):55-58.
  32. Jovanovic MMK, A. Z.; Stanojevic, G.; Stojanovic, M.; Smiljkovic, I. D.; Damnjanovic, Z. Early detection of postoperative deep vein thrombosis after general surgical procedures. *HealthMED*. 2012;6(3):1023-1032.
  33. Kearon CG, J. S.; Douketis, J.; Crowther, M.; Brill-Edwards, P.; Weitz, J. I.; Hirsh, J. Management of suspected deep venous thrombosis in outpatients by using clinical assessment and D-dimer testing. *Annals of Internal Medicine*. 2001;135(2):108-111.
  34. Kearon CG, J. S.; Douketis, J.; Crowther, M. A.; Turpie, A. G.; Bates, S. M.; Lee, A.; Brill-Edwards, P.; Finch, T.; Gent, M. A randomized trial of diagnostic strategies after normal proximal vein ultrasonography for suspected deep venous thrombosis: D-dimer testing compared with repeated ultrasonography.[Summary for patients in Ann Intern Med. 2005 Apr 5;142(7):I48; PMID: 15809455]. *Annals of Internal Medicine*. 2005;142(7):490-496.
  35. Walsh KK, N.; Long, K.; Cervi, P. An algorithm for the investigation and management of patients with suspected deep venous thrombosis at a district general hospital. *Postgraduate Medical Journal*. 2002;78(926):742-745.
  36. Lindahl TLL, T. H.; Ranby, M.; Fransson, S. G. Clinical evaluation of a diagnostic strategy for deep venous thrombosis with exclusion by low plasma levels of fibrin degradation product D-dimer. *Scandinavian Journal of Clinical & Laboratory Investigation*. 1998;58(4):307-316.
  37. Ott PA, L.; Jensen, R. H.; Nyeland, B.; Pedersen, B. Assessment of D-dimer in plasma: diagnostic value in suspected deep venous thrombosis of the leg. *Acta Medica Scandinavica*. 1988;224(3):263-267.
  38. Siragusa S, Terulla V, Pirrelli S, et al. A rapid D-dimer assay in patients presenting at the emergency room with suspected acute venous thrombosis: accuracy and relation to clinical variables. *Haematologica*. 2001;86(8):856-861.
  39. Stevens SM, Gregory Elliott C, Woller SC, et al. The use of a fixed high sensitivity to evaluate five D-dimer assays' ability to rule out deep venous thrombosis: a novel approach. *British Journal of Haematology*. 2005;131(3):341-347.
  40. Gómez-Jabalera E, Bellmunt Montoya S, Fuentes-Camps E, Escudero Rodríguez JR. Age-adjusted D-dimer for the diagnosis of deep vein thrombosis. *Phlebology*. 2018 Aug;33(7):458-63.

**Not enough information to determine test accuracy for DVT (n=43)**

1. Baker WHH, A. C. The normal Doppler venous examination. *Angiology*. 1983;34(4):283-

288.

2. Clement DLC, R. Diagnostic performance of segmental plethysmography and Doppler ultrasound in obliterating vascular diseases in the lower limbs. *Angiology*. 1980;31(4):272-282.
3. Elhabyan AB, M.; Rosencrance, J. G.; Lucas, B. D.; Nakker, S.; Reyes, B. J. The quantitative immunoturbidimetric D-dimer method to rule out venous thromboembolism (VTE). *West Virginia Medical Journal*. 2007;103(1):22-25.
4. Ingber SS, R.; Lee, J.; Geerts, W.; Brnjac, E. Combination pretest probability assessment and D-dimer did not reduce outpatient imaging for venous thromboembolism in a tertiary care hospital emergency department. *CJEM Canadian Journal of Emergency Medical Care*. 2014;16(1):53-62.
5. Kollef MHZ, M.; Eisenberg, P. R. Predictive value of a rapid semiquantitative D-dimer assay in critically ill patients with suspected venous thromboembolic disease. *Critical Care Medicine*. 2000;28(2):414-420.
6. Linkins LAB, S. M.; Lang, E.; Kahn, S. R.; Douketis, J. D.; Julian, J.; Parpia, S.; Gross, P.; Weitz, J. I.; Spencer, F. A.; Lee, A. Y.; O'Donnell, M. J.; Crowther, M. A.; Chan, H. H.; Lim, W.; Schulman, S.; Ginsberg, J. S.; Kearon, C. Selective D-dimer testing for diagnosis of a first suspected episode of deep venous thrombosis: a randomized trial. *Annals of Internal Medicine*. 2013;158(2):93-100.
7. Nordenholz KEZ, M.; Dyer, D. S.; Hanson, J. A.; Heard, K. Radiologic diagnoses of patients who received imaging for venous thromboembolism despite negative D-dimer tests. *American Journal of Emergency Medicine*. 2007;25(9):1040-1046.
8. Pomero FB, C.; Serraino, C.; Panzone, S.; Bracco, C.; Migliore, E.; Dalmasso, P.; Perin, P. C.; Fenoglio, L. M. Venous lower-limb evaluation in patients with acute pulmonary embolism. *Southern Medical Journal*. 2011;104(6):405-411.
9. Rathbun SWW, T. L.; Raskob, G. E. Negative D-dimer result to exclude recurrent deep venous thrombosis: a management trial. [Summary for patients in Ann Intern Med. 2004 Dec 7;141(11):146; PMID: 15583221]. *Annals of Internal Medicine*. 2004;141(11):839-845.
10. Rathbun SWW, T. L.; Raskob, G. E. Exclusion of first-episode deep-vein thrombosis after-hours using D-dimer. *Blood Coagulation & Fibrinolysis*. 2007;18(8):795-800.
11. Schellong SMS, T.; Halbritter, K.; Beyer, J.; Siegert, G.; Oettler, W.; Schmidt, B.; Schroeder, H. E. Complete compression ultrasonography of the leg veins as a single test for the diagnosis of deep vein thrombosis. *Thrombosis & Haemostasis*. 2003;89(2):228-234.
12. Sevestre MAL, J.; Casez, P.; Bressollette, L.; Taiar, M.; Pernod, G.; Quere, I.; Bosson, J. L. Accuracy of complete compression ultrasound in ruling out suspected deep venous thrombosis in the ambulatory setting. A prospective cohort study. *Thrombosis & Haemostasis*. 2009;102(1):166-172.
13. Sivananthan GH, N. J.; Estes, J. M.; Alessi-Chinetti, J. M.; Polak, J. F. Value of complete full-length lower extremity sonography in patients undergoing computed tomographic pulmonary angiography. *Journal of Ultrasound in Medicine*. 2014;33(12):2137-2143.
14. Tick LWT, E.; van Voorthuizen, T.; Hovens, M. M.; Leeuwenburgh, I.; Lobatto, S.; Stijnen, P. J.; van der Heul, C.; Huisman, P. M.; Kramer, M. H.; Huisman, M. V. Practical diagnostic management of patients with clinically suspected deep vein thrombosis by clinical probability test, compression ultrasonography, and D-dimer test. *American Journal of Medicine*. 2002;113(8):630-635.
15. Atri MH, M. J.; Reinhold, C.; Leclerc, J.; Ye, S.; Illescas, F. F.; Bret, P. M. Accuracy of sonography in the evaluation of calf deep vein thrombosis in both postoperative surveillance and symptomatic patients. *AJR American Journal of Roentgenology*. 1996;166(6):1361-1367.

16. Bouman CSY, S. T.; Sybesma, J. P. Comparison of the efficacy of D-dimer, fibrin degradation products and prothrombin fragment 1+2 in clinically suspected deep venous thrombosis. *Thrombosis Research*. 1995;77(3):225-234.
17. Persson AVJ, C.; Zide, R.; Jewell, E. R. Use of the triplex scanner in diagnosis of deep venous thrombosis. *Archives of Surgery*. 1989;124(5):593-596.
18. van der Velde EFT, D. B.; Ten Cate-Hoek, A. J.; Oudega, R.; Stoffers, H. E.; Bossuyt, P. M.; Buller, H. R.; Prins, M. H.; Hoes, A. W.; Moons, K. G.; van Weert, H. C. Comparing the diagnostic performance of 2 clinical decision rules to rule out deep vein thrombosis in primary care patients. *Annals of Family Medicine*. 2011;9(1):31-36.
19. Michiels JJM, H.; Moosdorff, W.; Lao, M.; Gadiseur, A.; Schroyens, W. Safe Exclusion of Deep Vein Thrombosis by a Rapid Sensitive ELISA D-dimer and Compression Ultrasonography in 1330 Outpatients With Suspected DVT. *Angiology*. 2016;67(8):781-787.
20. Rahiminejad MR, A.; Prabhudesai, S.; McClinton, D.; MacCallum, P.; Platton, S.; Friedman, E. Evaluating the Use of a Negative D-Dimer and Modified Low Wells Score in Excluding above Knee Deep Venous Thrombosis in an Outpatient Population, Assessing Need for Diagnostic Ultrasound. *ISRN Radiology*. 2014;2014:519875.
21. Bendick PJG, J. L.; Holden, R. W.; Dille, R. S. Pitfalls of the Doppler examination for venous thrombosis. *American Surgeon*. 1983;49(6):320-323.
22. Comerota AJK, M. L.; Greenwald, L. L.; Leefmans, E.; Czeredarczuk, M.; White, J. V. Venous duplex imaging: should it replace hemodynamic tests for deep venous thrombosis? *Journal of Vascular Surgery*. 1990;11(1):53-59; discussion 59-61.
23. Cronan JJD, G. S.; Grusmark, J. Lower-extremity deep venous thrombosis: further experience with and refinements of US assessment. *Radiology*. 1988;168(1):101-107.
24. Belcaro G. Evaluation of recurrent deep venous thrombosis using colour duplex scanning--comparison with venography. *Vasa*. 1992;21(1):22-26.
25. Appelman PT, De Jong TE, Lampmann LE. Deep venous thrombosis of the leg: US findings. *Radiology*. 1987;163(3):743-746.
26. Arrive L, Monnier-Cholley L, Serru V, et al. [D-Dimer determination combined with clinical probability for the diagnosis of leg venous thrombosis]. *Journal de Radiologie*. 2002;83(3):337-340.
27. Elias-Hernandez TO-C, R.; Fernandez-Jimenez, D.; Jara-Palomares, L.; Jimenez-Castro, V.; Barrot-Cortes, E. [Clinical usefulness of three quantitative D-dimers tests in outpatients with suspected deep vein thrombosis]. *Revista Clinica Espanola*. 2012;212(5):235-241.
28. Maurer HJ. [Diagnosis of deep venous thrombosis of the leg. Phlebofluorography versus Doppler sonography]. *Rofo: Fortschritte auf dem Gebiete der Rontgenstrahlen und der Nuklearmedizin*. 1986;144(2):196-198.
29. Miselli AL, P.; Mandrioli, R.; Ugolotti, U.; Marcato, C.; Quintavalla, R. [Ultrasonography in the diagnosis of deep venous thrombosis of the legs]. *Radiologia Medica*. 1990;80(4):469-473.
30. Roggenbuck LD, K. Comparative evaluation of different D-dimer assays for exclusion of venous thromboembolism in a clinical routine setting. [German]. *LaboratoriumsMedizin*. 2008;32(3):177-181.
31. Trujillo-Santos AJGdL, M. D.; Rios-Tamayo, R.; Jimenez-Puente, A.; Garcia-Sanchez, J. E. [Clinical and analytic diagnostic evaluation of deep venous thrombosis of the lower limbs]. *Medicina Clinica*. 2000;114(2):46-49.
32. Van Gemmeren DF, F.; Ruhnke-Trautmann, M.; Hartmann, C. A.; Gotzen, R.; Wolf, K. J.; Distler, A.; Schulte, K. L. Diagnosis of deep venous thrombosis with color-coded duplex sonography and age determination of the thrombosis with ultrasound. [German]. *Zeitschrift fur Kardiologie*. 1991;80(8):523-528.

33. Biondetti PR, Vigo M, Tomasella G, Prandoni P. [Diagnosis of deep venous thrombosis of the legs: accuracy of ultrasonography using vein compression]. *Radiologia Medica*. 1990;80(4):463-468.
34. Furst GK, F. P.; Modder, U. [Color-coded Doppler sonography of deep venous thrombosis--possibilities and limitations in the area of the veins of the pelvis and the lower leg including postthrombotic changes]. *Rontgen-Blatter*. 1990;43(5):195-202.
35. Furst GK, F. P.; Trappe, R. P.; Modder, U. The diagnosis of deep vein thrombosis. Colour Doppler sonography versus phlebography. [German]. *RoFo Fortschritte auf dem Gebiete der Rontgenstrahlen und der Neuen Bildgebenden Verfahren*. 1990;152(2):151-158.
36. Habscheid WH, M.; Klein, S. [Compression sonography as a procedure in the diagnosis of acute deep venous thrombosis of the leg]. *Medizinische Klinik*. 1990;85(1):6-12.
37. Habscheid WL, P. [Diagnosis of acute deep leg vein thrombosis with compression ultrasonography]. *Ultraschall in der Medizin*. 1990;11(6):268-273.
38. Habscheid WW, T. [Diagnosis of deep leg vein thromboses by real-time sonography]. *Deutsche Medizinische Wochenschrift*. 1988;113(15):586-591.
39. Schonhofer B, Bundschu HD, Wolf K, Grehn S. [Color-coded duplex ultrasonography compared to phlebography in deep leg and pelvic vein thrombosis]. *Medizinische Klinik*. 1992;87(4):172-178.
40. Schutgens RE, Ackermark P, Haas FJ, et al. Combination of a normal D-dimer concentration and a non-high pretest clinical probability score is a safe strategy to exclude deep venous thrombosis. *Circulation*. 2003;107(4):593-597.
41. Marti-Mestre FXC-C, M. A.; Romera, A.; Herranz, C. The role of clinical signs in combination to the D-dimer in the diagnosis of deep vein thrombosis of lower limbs in an emergency room. [Spanish]. *Angiologia*. 2005;57(3):219-224.
42. Taira TT, B. R.; Carmen, M.; Chohan, J.; Singer, A. J. Risk of venous thromboembolism in patients with borderline quantitative D-dimer levels. *American Journal of Emergency Medicine*. 2010;28(4):450-453.
43. Pflasterer-Schonsiegel MTH, N.; Gellermann, J.; Felix, R. Clinical application on colour-coded duplex sonography in the diagnosis of lower extremity deep venous thrombosis. [German]. *Radiologia Diagnostica*. 1994;35(4):269-273.

#### **Sample size <100 patients (n=23)**

1. Alexander RH, Folse R, Pizzorno J, Conn R. Thrombophlebitis and thromboembolism: results of a prospective study. *Annals of Surgery*. 1974;180(6):883-887.
2. Bjorgell ON, P. E.; Jarenros, H. Isolated nonfilling of contrast in deep leg vein segments seen on phlebography, and a comparison with color Doppler ultrasound, to assess the incidence of deep leg vein thrombosis. *Angiology*. 2000;51(6):451-461.
3. Bucek RA, Quehenberger P, Feliks I, Handler S, Reiter M, Minar E. Results of a new rapid d-dimer assay (cardiac d-dimer) in the diagnosis of deep vein thrombosis. *Thrombosis Research*. 2001;103(1):17-23.
4. Cavaye DK, A. T.; Graham, J. C.; Appleberg, M.; Briggs, G. M. Duplex ultrasound diagnosis of lower limb deep venous thrombosis. *Australian & New Zealand Journal of Surgery*. 1990;60(4):283-288.
5. Duwe KMS, M.; Budorick, N. E.; Austin, J. H.; Berkmen, Y. M. Evaluation of the lower extremity veins in patients with suspected pulmonary embolism: a retrospective comparison of helical CT venography and sonography. 2000 ARRS Executive Council Award I. American Roentgen Ray Society. *AJR American Journal of Roentgenology*. 2000;175(6):1525-1531.
6. Elias AA, M. F.; Roul, C.; Monteil, O.; Villain, P.; Serradimigni, A.; Juhan-Vague, I. Assessment of D-dimer measurement by ELISA or latex methods in deep vein

- thrombosis diagnosed by ultrasonic duplex scanning. *Fibrinolysis*. 1990;4(4):237-240.
7. Foley WDM, W. D.; Lawson, T. L.; Erickson, S.; Quiroz, F. A.; Macrander, S. Color Doppler ultrasound imaging of lower-extremity venous disease. *AJR American Journal of Roentgenology*. 1989;152(2):371-376.
  8. Gaitini DK, J. K.; Pery, M.; Markel, A. Late changes in veins after deep venous thrombosis: ultrasonographic findings. *Rofo: Fortschritte auf dem Gebiete der Rontgenstrahlen und der Nuklearmedizin*. 1990;153(1):68-72.
  9. George JEB, R. E. Noninvasive detection of deep venous thrombosis. A critical evaluation. *American Surgeon*. 1990;56(2):76-78.
  10. Henkin REY, J. S.; Quinn, J. L., 3rd; Bergan, J. J. Radionuclide venography (RNV) in lower extremity venous disease. *Journal of Nuclear Medicine*. 1974;15(3):171-175.
  11. Kiil JM, J. C. Ultrasound and clinical diagnosis of deep vein thrombosis of the leg. *Acta Radiologica: Diagnosis*. 1979;20(2):292-298.
  12. Vermeer HJY, P.; van Strijen, M. J.; Muradin, A. A.; Hudig, F.; Jansen, R. W.; Wijermans, P. W.; Gerrits, W. B. Exclusion of venous thromboembolism: evaluation of D-Dimer PLUS for the quantitative determination of D-dimer. *Thrombosis Research*. 2005;115(5):381-386.
  13. Urrutia ML, I.; Rodriguez, R.; Briceno de Rodriguez, A.; Isaza, B. [Duplex sonography in the diagnosis of deep venous thrombosis in the lower limbs]. *Revista Medica de Panama*. 1994;19(3):154-162.
  14. Szendro GN, A. N.; Zukowski, A. J. Duplex scanning in the assessment of deep venous incompetence. *Journal of Vascular Surgery*. 1986;4(3):237-242.
  15. Monreal MM, E.; Salvador, R.; Bechini, J.; Donoso, L.; MaCallejas, J.; Foz, M. Real-time ultrasound for diagnosis of symptomatic venous thrombosis and for screening of patients at risk: correlation with ascending conventional venography. *Angiology*. 1989;40(6):527-533.
  16. Miranda CH, M. Comparison of D-dimer findings with venous duplex examinations: A work in progress. *Journal of Vascular Technology*. 2002;26(2):103-105.
  17. Meadway JN, A. N.; Walker, C. J.; O'Connell, J. D. Value of Doppler ultrasound in diagnosis of clinically suspected deep vein thrombosis. *British Medical Journal*. 1975;4(5996):552-554.
  18. Markel AW, Y.; Gaitini, D. Doppler ultrasound in the diagnosis of venous thrombosis. *Angiology*. 1995;46(1):65-73.
  19. Funfsinn NC, C.; Biasiutti, F. D.; Korte, W.; Z'Brun, A.; Baumgartner, I.; Ulrich, M.; Cottier, C.; Lammle, B.; Wuillemin, W. A. Rapid D-dimer testing and pre-test clinical probability in the exclusion of deep venous thrombosis in symptomatic outpatients. *Blood Coagulation & Fibrinolysis*. 2001;12(3):165-170.
  20. Laaban JPA, A.; Horellou, M. H.; Conard, J.; Bouarfa, N.; Arkam, R.; Lorut, C.; Fretault, J.; Vadrot, D.; Samama, M.; Rochemaure, J. [Value of plasma D-dimer assays in the diagnosis of venous thromboembolism]. *Revue des Maladies Respiratoires*. 1997;14(2):119-127.
  21. Labropoulos NL, M.; Kalodiki, E.; al Kutoubi, A.; Chan, P.; Nicolaidis, A. N. Colour flow duplex scanning in suspected acute deep vein thrombosis; experience with routine use. *European Journal of Vascular & Endovascular Surgery*. 1995;9(1):49-52.
  22. Ezekowitz MDM, F.; Farlow, D.; Pope, C.; Denny, D.; Markowitz, D.; Hammers, L.; Ali, A.; Hirsh, J. Comparison of platelet scintigraphy, impedance plethysmography gray scale and color flow duplex ultrasound and venography for the diagnosis of venous thrombosis. *Progress in Clinical & Biological Research*. 1990;355:23-27.
  23. Gaitini DK, J.; Pery, M.; Markel, A.; Weich, I. [Ultrasonographic diagnosis of deep vein thrombosis of the leg]. *Harefuah*. 1989;117(10):295-297.



**Calf DVT only (n=4)**

1. Gottlieb RHV, S. L.; Syed, L.; Shyu, C.; Fultz, P. J.; Rubens, D. J.; Strang, J. G.; Carson, N.; DiGrazio, W. J.; Francis, C. W. Randomized prospective study comparing routine versus selective use of sonography of the complete calf in patients with suspected deep venous thrombosis. *AJR American Journal of Roentgenology*. 2003;180(1):241-245.
2. Robertson PLG, S. K.; Waugh, J. R.; Fabiny, R. P. J. Colour-assisted compression ultrasound in the diagnosis of calf deep venous thrombosis. *Medical Journal of Australia*. 1995;163(10):515-518.
3. Sartori ML, G.; Favaretto, E.; Migliaccio, L.; Iotti, M.; Giusto, L.; Ghirarduzzi, A.; Palareti, G.; Cosmi, B. Ultrasound Characteristics of Calf Deep Vein Thrombosis and Residual Vein Obstruction After Low Molecular Weight Heparin Treatment. *European Journal of Vascular & Endovascular Surgery*. 2016;7:7.
4. Sica GTP, M. E.; Koniaris, L. S.; Goldhaber, S. Z.; Polak, J. F.; Mukerjee, A.; Tempany, C. M. Isolated calf vein thrombosis: comparison of MR venography and conventional venography after initial sonography in symptomatic patients. *Academic Radiology*. 2001;8(9):856-863.

**Unable to obtain full-text (n=4)**

1. Leroyer CB, L.; Oger, E.; Le Ber, C.; Nonent, M.; Boulch, M. T.; Clavier, J.; Mottier, D. Diagnostic value of plasma D-Dimer measurement, using ELISA test, in front of a suspected deep venous thrombosis. *European Journal of Internal Medicine*. 1996;7(2):99-103.
2. Lestin HGE, U.; Hergert, M.; Schwarz, M.; Gehrke, J. Investigations on the relevance of hemostaseologic markers for the diagnosis, therapy and follow-up of deep venous thrombosis. [German]. *Klinisches Labor*. 1996;42(9):745-756.
3. Nazarenko GIK, V. V.; Anokhin, N. V.; Iugova, T. M.; Kungurtsev, E. V.; Repnikova, T. R. [D-dimer in diagnosis of acute thromboses of lower-limb deep veins]. *Angiologiya i Sosudistaia Khirurgiia/Angiology & Vascular Surgery*. 2009;15(3):15-18.
4. Palen TEA, D. M. Performance characteristics of three quantitative D-dimer assays for outpatient evaluation of venous thromboembolism and its use in a clinical guideline for a group model HMO. *Journal of Clinical Ligand Assay*. 2005;28(3):123-129.

#### Supplement 4. Risk of bias assessment for individual studies.

Low: low risk of bias introduced by study methods

High: high risk of bias introduced by study methods

Unclear: unclear risk of bias due to insufficient data reported to permit a judgment

Whiting PF, Rutjes AWS, Westwood ME, Mallett S, Deeks JJ, Reitsma JB, Leeflang MMG, Sterne JAC, Bossuyt PMM: **QUADAS-2: a revised tool for the quality assessment of diagnostic accuracy studies.** *Ann Intern Med* 2011, **155**(8):529-536.

#### Recurrent DVT

| Study         | Patient Selection | Index Test | Reference Standard | Flow and Timing |
|---------------|-------------------|------------|--------------------|-----------------|
| Aguilar 2007  | Low               | Low        | Low                | Low             |
| Prandoni 2002 | Low               | High       | Low                | Low             |

#### Proximal compression ultrasound

| Study              | Patient Selection | Index Test | Reference Standard | Flow and Timing |
|--------------------|-------------------|------------|--------------------|-----------------|
| Anderson 1999      | Low               | Low        | Low                | Low             |
| Aronen 1994        | Low               | Low        | Low                | Low             |
| Birdwell 2000      | Low               | Low        | Low                | Low             |
| Cogo 1993          | Low               | Low        | Low                | Low             |
| Friera 2002        | Low               | Low        | Low                | Low             |
| Gudmundsen 1990    | Low               | Low        | Low                | Low             |
| Lensing 1989       | Low               | Low        | Low                | Low             |
| Pedersen 1991      | Low               | Low        | Low                | Low             |
| Quintavallaa 1991  | Low               | Low        | Low                | Low             |
| van Ramshorst 1991 | Low               | Low        | Low                | Low             |
| Wells 1995a        | Low               | Unclear    | Low                | Low             |
| Wells 1995b        | Low               | Low        | Low                | Low             |
| Wells 2003         | Low               | Unclear    | Unclear            | Low             |

#### Serial ultrasound

| Study          | Patient Selection | Index Test | Reference Standard | Flow and Timing |
|----------------|-------------------|------------|--------------------|-----------------|
| Anderson 1999  | Low               | Low        | Low                | Low             |
| Bernardi 1998  | Low               | High       | Low                | Low             |
| Birdwell 1998  | Low               | Low        | Low                | Low             |
| Friera 2002    | Low               | Low        | Unclear            | Low             |
| Schutgens 2002 | Low               | Unclear    | Low                | Low             |

|               |     |         |         |     |
|---------------|-----|---------|---------|-----|
| Williams 2005 | Low | Unclear | Unclear | Low |
|---------------|-----|---------|---------|-----|

### Whole leg ultrasound

| Study                      | Patient Selection | Index Test | Reference Standard | Flow and Timing |
|----------------------------|-------------------|------------|--------------------|-----------------|
| Bradley 1993               | Low               | Low        | Low                | Low             |
| De Valois 1990             | Low               | Low        | Low                | Low             |
| Habscheid 1990             | Low               | Low        | Low                | Low             |
| Kalodiki 1993              | Low               | Low        | Low                | Low             |
| Miller 1996                | Low               | Low        | Low                | Low             |
| Montefusco-von Kleist 1993 | Low               | Low        | Low                | Low             |
| Theodorou 2003             | Low               | Low        | Low                | Low             |
| Bendayan 1991              | Low               | Low        | Low                | Low             |
| Grosser 1990               | Low               | Low        | Low                | Low             |
| Grosser 1991               | Low               | Low        | Low                | Low             |

### D-dimer

| Study            | Patient Selection | Index Test | Reference Standard | Flow and Timing |
|------------------|-------------------|------------|--------------------|-----------------|
| Canan 2012       | Low               | Low        | Low                | Low             |
| Cornuz 2002      | Low               | Low        | Low                | Low             |
| D'Angelo 1996    | Low               | Low        | Low                | Low             |
| Diamond 2005     | Low               | Low        | Low                | Low             |
| Haenssle 2013    | Low               | Low        | Low                | Low             |
| Hansson 1984     | Low               | Low        | Low                | Low             |
| Jennersjo 2005   | Low               | Low        | Low                | Low             |
| Knecht 1997      | Low               | Low        | Low                | Low             |
| LeBlanche 1999   | Low               | Low        | Low                | Low             |
| Luxembourg 2012  | Low               | Low        | Low                | Low             |
| Nata 2013        | Low               | Low        | Low                | Low             |
| Oudega 2005      | Low               | Low        | Low                | Low             |
| Schutgens 2005   | Low               | Unclear    | Low                | Low             |
| Williams 2005    | Low               | Unclear    | Low                | Low             |
| Ilkhanipour 2004 | Low               | Low        | Low                | Low             |
| Mantoni 2008     | Low               | Unclear    | Unclear            | High            |

## Supplement 5. Diagnostic Pathways Assessed for Lower Extremity DVT

### a. Whole leg US

- Positive whole leg US → anticoagulate
- Negative whole leg US → no treatment

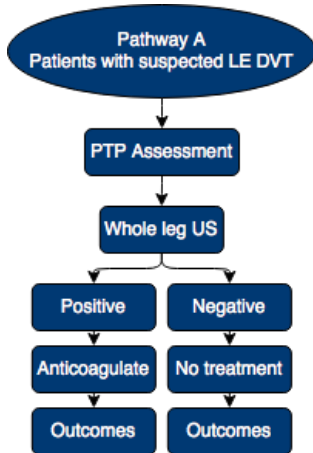

### b. Proximal CUS

- Positive proximal CUS → anticoagulate
- Negative proximal CUS → no treatment

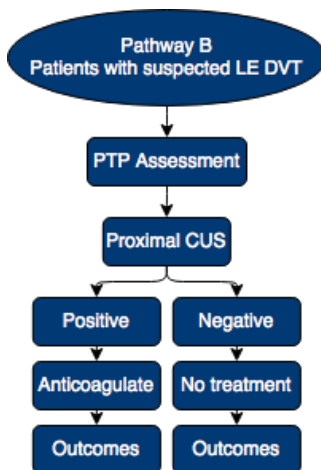

c. Proximal CUS

- Positive proximal CUS → anticoagulate
- Negative proximal CUS → D-Dimer
  - Positive D-Dimer → anticoagulate
  - Negative D-Dimer → no treatment

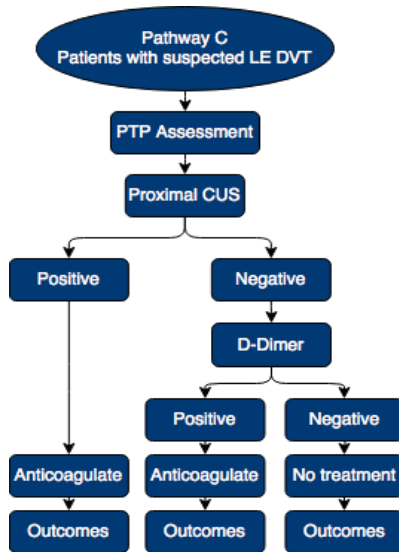

d. Proximal CUS

- Positive proximal CUS → anticoagulate
- Negative proximal CUS → D-dimer
  - Positive D-dimer → serial US
    - Positive serial US → anticoagulate
    - Negative serial US → no treatment
  - Negative D-dimer → no treatment

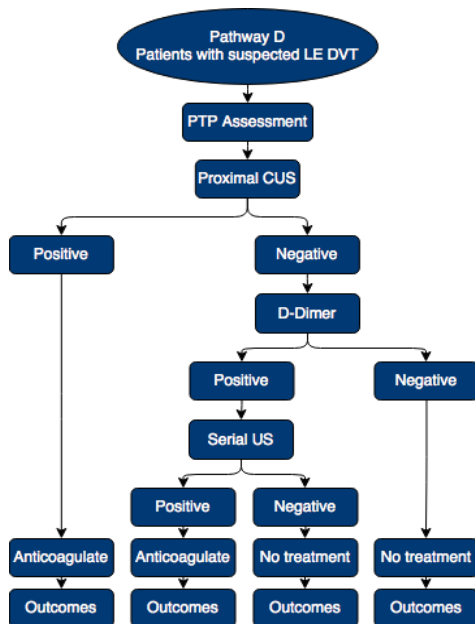

e. Proximal CUS

- Positive proximal CUS → anticoagulate
- Negative proximal CUS → Serial US
  - Positive Serial US → anticoagulate
  - Negative Serial US → no treatment

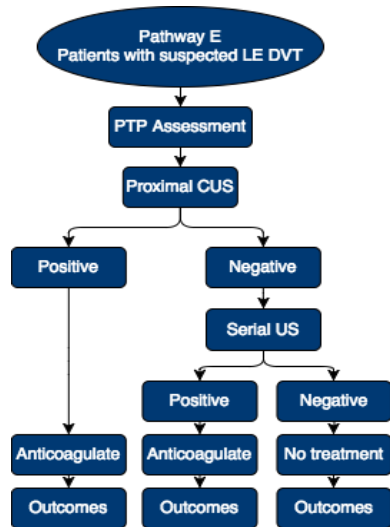

f. Proximal CUS

- Positive proximal CUS → anticoagulate
- Negative proximal CUS → D-Dimer
  - Positive D-Dimer → venography
    - Positive venography → anticoagulate
    - Negative venography → No treatment
  - Negative D-Dimer → No treatment

\*Venography was deemed not suitable as a follow-up test due to the use of ultrasound as the accepted reference standard for DVT diagnosis.

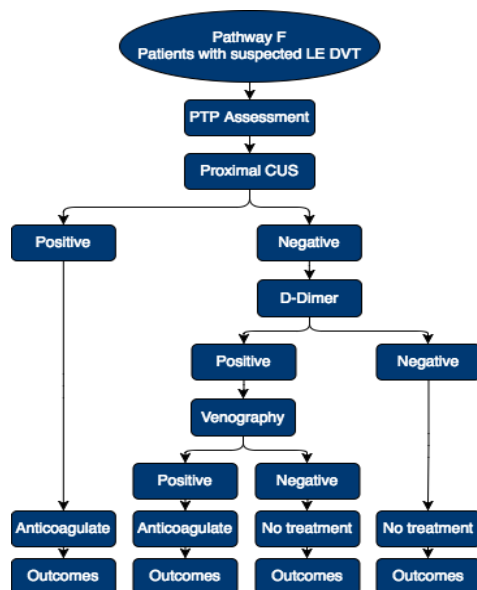

g. D-dimer

- Positive D-dimer → anticoagulate
- Negative D-dimer → no treatment

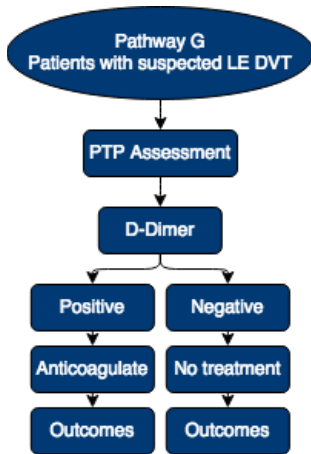

h. D-dimer

- Positive D-dimer → proximal CUS
  - Positive proximal CUS → anticoagulate
  - Negative proximal CUS → no treatment
- Negative D-dimer → no treatment

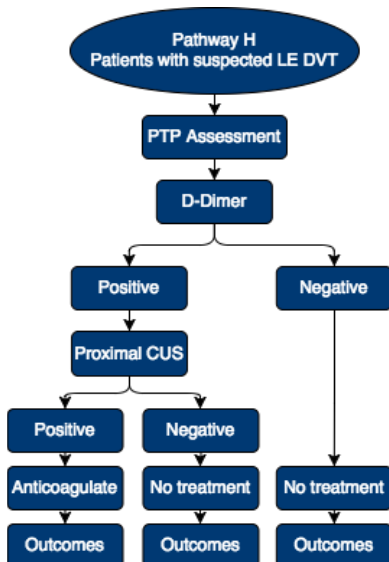

i. D-dimer

- Positive D-dimer → whole leg/serial US
  - Positive whole leg/serial US → anticoagulate
  - Negative whole leg/serial US → no treatment
- Negative D-dimer → no treatment

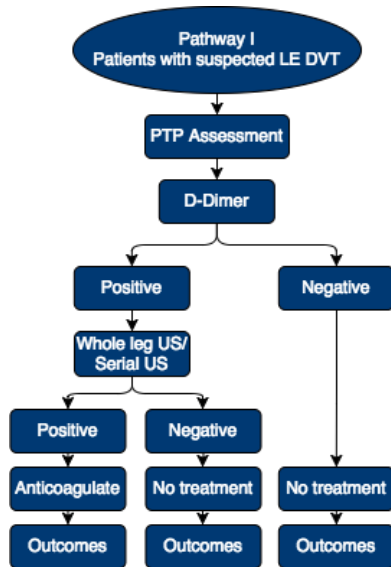

\*\* Whole Leg US sensitivity and specificity estimates were used to model Pathway I.

Note: in the algorithms, watchful waiting will follow negative tests and low/normal probability unless stated otherwise.

| Legend |                        |
|--------|------------------------|
| DVT    | deep vein thrombosis   |
| US     | ultrasound             |
| CUS    | compression ultrasound |



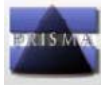

# PRISMA-DTA Checklist

| Section/topic                   | #  | PRISMA-DTA Checklist Item                                                                                                                                                                                                                                                | Reported on page # |
|---------------------------------|----|--------------------------------------------------------------------------------------------------------------------------------------------------------------------------------------------------------------------------------------------------------------------------|--------------------|
| <b>TITLE / ABSTRACT</b>         |    |                                                                                                                                                                                                                                                                          |                    |
| Title                           | 1  | Identify the report as a systematic review (+/- meta-analysis) of diagnostic test accuracy (DTA) studies.                                                                                                                                                                | 1                  |
| Abstract                        | 2  | Abstract: See PRISMA-DTA for abstracts.                                                                                                                                                                                                                                  | 2                  |
| <b>INTRODUCTION</b>             |    |                                                                                                                                                                                                                                                                          |                    |
| Rationale                       | 3  | Describe the rationale for the review in the context of what is already known.                                                                                                                                                                                           | 3                  |
| Clinical role of index test     | D1 | State the scientific and clinical background, including the intended use and clinical role of the index test, and if applicable, the rationale for minimally acceptable test accuracy (or minimum difference in accuracy for comparative design).                        | 3                  |
| Objectives                      | 4  | Provide an explicit statement of question(s) being addressed in terms of participants, index test(s), and target condition(s).                                                                                                                                           | 3                  |
| <b>METHODS</b>                  |    |                                                                                                                                                                                                                                                                          |                    |
| Protocol and registration       | 5  | Indicate if a review protocol exists, if and where it can be accessed (e.g., Web address), and, if available, provide registration information including registration number.                                                                                            | 3                  |
| Eligibility criteria            | 6  | Specify study characteristics (participants, setting, index test(s), reference standard(s), target condition(s), and study design) and report characteristics (e.g., years considered, language, publication status) used as criteria for eligibility, giving rationale. | 4                  |
| Information sources             | 7  | Describe all information sources (e.g., databases with dates of coverage, contact with study authors to identify additional studies) in the search and date last searched.                                                                                               | 3                  |
| Search                          | 8  | Present full search strategies for all electronic databases and other sources searched, including any limits used, such that they could be repeated.                                                                                                                     | Supplement 1       |
| Study selection                 | 9  | State the process for selecting studies (i.e., screening, eligibility, included in systematic review, and, if applicable, included in the meta-analysis).                                                                                                                | 4                  |
| Data collection process         | 10 | Describe method of data extraction from reports (e.g., piloted forms, independently, in duplicate) and any processes for obtaining and confirming data from investigators.                                                                                               | 4                  |
| Definitions for data extraction | 11 | Provide definitions used in data extraction and classifications of target condition(s), index test(s), reference standard(s) and other characteristics (e.g. study design, clinical setting).                                                                            | 4-5                |
| Risk of bias and applicability  | 12 | Describe methods used for assessing risk of bias in individual studies and concerns regarding the applicability to the review question.                                                                                                                                  | 5, Supplement 4    |
| Diagnostic accuracy measures    | 13 | State the principal diagnostic accuracy measure(s) reported (e.g. sensitivity, specificity) and state the unit of assessment (e.g. per-patient, per-lesion).                                                                                                             | 5                  |
| Synthesis of results            | 14 | Describe methods of handling data, combining results of studies and describing variability between studies. This could include, but is not limited to: a) handling of multiple definitions of target condition. b) handling of multiple thresholds of                    | 5                  |

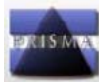

# PRISMA-DTA Checklist

test positivity, c) handling multiple index test readers, d) handling of indeterminate test results, e) grouping and comparing tests, f) handling of different reference standards

Page 1 of 2

| Section/topic                  | #  | PRISMA-DTA Checklist Item                                                                                                                                                                                                                                                                         | Reported on page # |
|--------------------------------|----|---------------------------------------------------------------------------------------------------------------------------------------------------------------------------------------------------------------------------------------------------------------------------------------------------|--------------------|
| Meta-analysis                  | D2 | Report the statistical methods used for meta-analyses, if performed.                                                                                                                                                                                                                              | 5                  |
| Additional analyses            | 16 | Describe methods of additional analyses (e.g., sensitivity or subgroup analyses, meta-regression), if done, indicating which were pre-specified.                                                                                                                                                  | N/A                |
| <b>RESULTS</b>                 |    |                                                                                                                                                                                                                                                                                                   |                    |
| Study selection                | 17 | Provide numbers of studies screened, assessed for eligibility, included in the review (and included in meta-analysis, if applicable) with reasons for exclusions at each stage, ideally with a flow diagram.                                                                                      | 5-6, Figure 1      |
| Study characteristics          | 18 | For each included study provide citations and present key characteristics including: a) participant characteristics (presentation, prior testing), b) clinical setting, c) study design, d) target condition definition, e) index test, f) reference standard, g) sample size, h) funding sources | 5-6, Table 1       |
| Risk of bias and applicability | 19 | Present evaluation of risk of bias and concerns regarding applicability for each study.                                                                                                                                                                                                           | 6                  |
| Results of individual studies  | 20 | For each analysis in each study (e.g. unique combination of index test, reference standard, and positivity threshold) report 2x2 data (TP, FP, FN, TN) with estimates of diagnostic accuracy and confidence intervals, ideally with a forest or receiver operator characteristic (ROC) plot.      | Figures 2-5        |
| Synthesis of results           | 21 | Describe test accuracy, including variability; if meta-analysis was done, include results and confidence intervals.                                                                                                                                                                               | 6-12               |
| Additional analysis            | 23 | Give results of additional analyses, if done (e.g., sensitivity or subgroup analyses, meta-regression; analysis of index test: failure rates, proportion of inconclusive results, adverse events).                                                                                                | N/A                |
| <b>DISCUSSION</b>              |    |                                                                                                                                                                                                                                                                                                   |                    |
| Summary of evidence            | 24 | Summarize the main findings including the strength of evidence.                                                                                                                                                                                                                                   | 12-13              |
| Limitations                    | 25 | Discuss limitations from included studies (e.g. risk of bias and concerns regarding applicability) and from the review process (e.g. incomplete retrieval of identified research).                                                                                                                | 13                 |
| Conclusions                    | 26 | Provide a general interpretation of the results in the context of other evidence. Discuss implications for future research and clinical practice (e.g. the intended use and clinical role of the index test).                                                                                     | 13                 |
| <b>FUNDING</b>                 |    |                                                                                                                                                                                                                                                                                                   |                    |
| Funding                        | 27 | For the systematic review, describe the sources of funding and other support and the role of the funders.                                                                                                                                                                                         | 14                 |

Adapted From: McInnes MDF, Moher D, Thoms BD, McGrath TA, Bossuyt PM, The PRISMA-DTA Group (2018). Preferred Reporting Items for a Systematic Review and Meta-analysis of Diagnostic Test Accuracy Studies: The PRISMA-DTA Statement. JAMA. 2018 Jan 23;319(4):388-396. doi: 10.1001/jama.2017.19163.

For more information, visit: [www.prisma-statement.org](http://www.prisma-statement.org).
